# Supplementary material for: Synthesis and biological evaluation of the new 1,3-dimethylxanthine derivatives with thiazolidine-4-one scaffold
Source: PubMed Central journal article supplement (PMC5289128; doi:10.1186/s13065-017-0241-0), 2017-02-01
Supplement: 13065_2017_241_MOESM1_ESM.pdf [file 13065_2017_241_MOESM1_ESM.pdf]

# NMR AND HRMS SPECTRA FOR THIAZOLIDINE-4-ONE DERIVATIVES (6a-k)

## 2-Phenyl-3-[(1,3-dimethylxanthin-7-yl)acetamido]thiazolidine-4-one (6a)

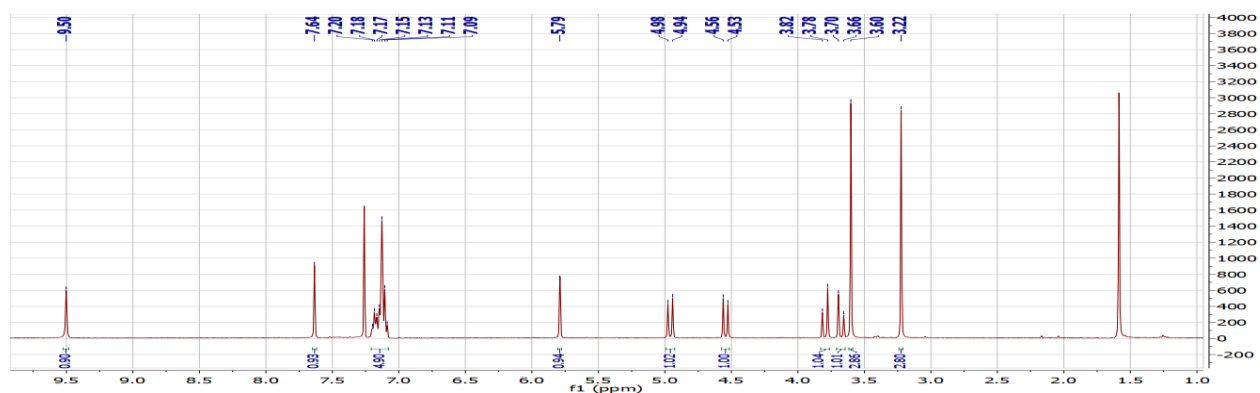

<sup>1</sup>H-RMN spectra of **6a**

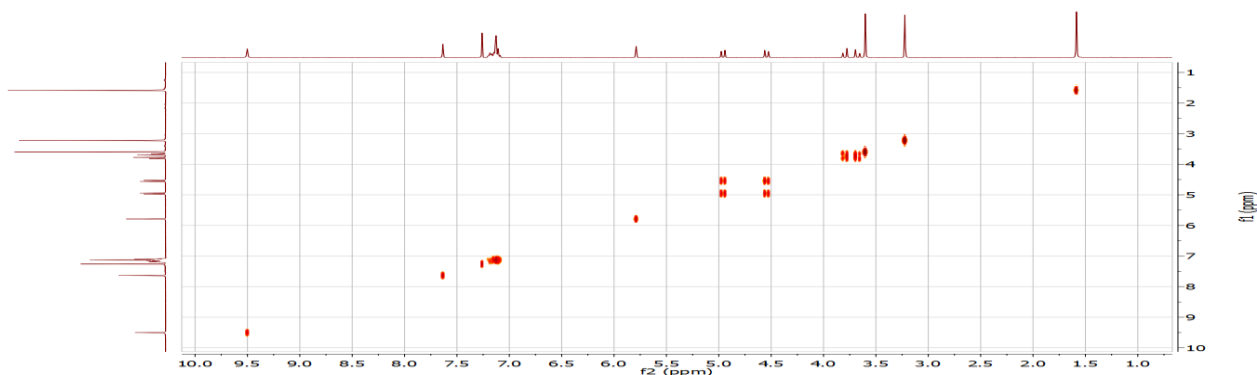

2D-COSY spectra of **6a**

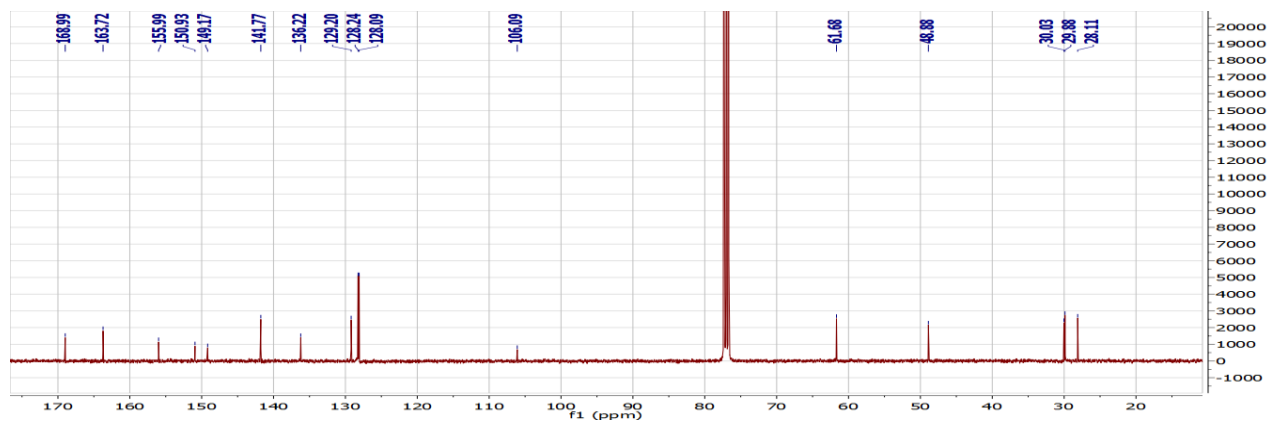

<sup>13</sup>C-RMN spectra of **6a**

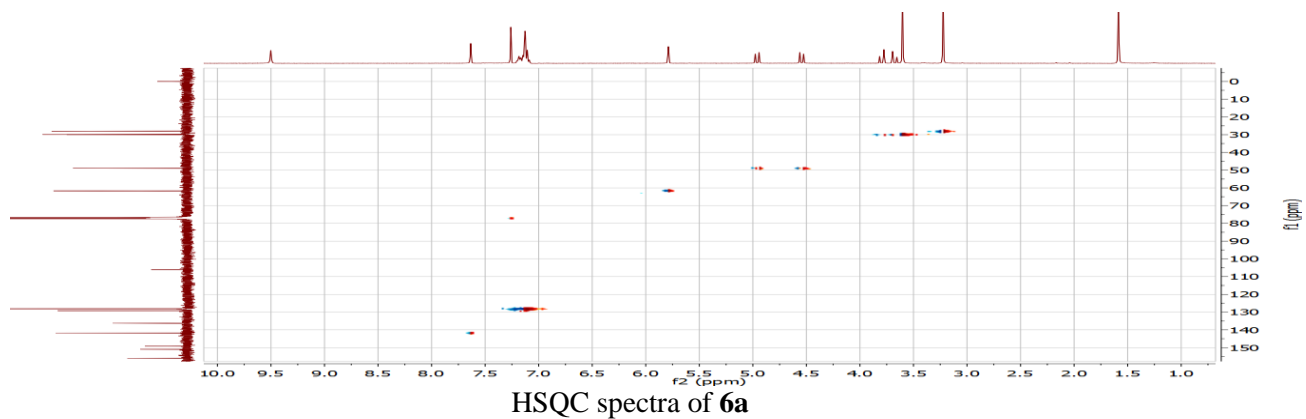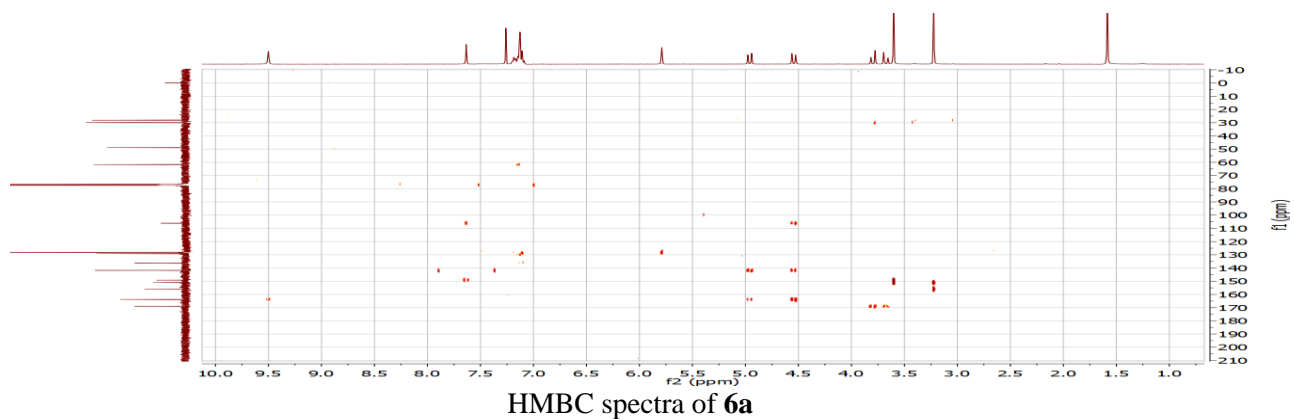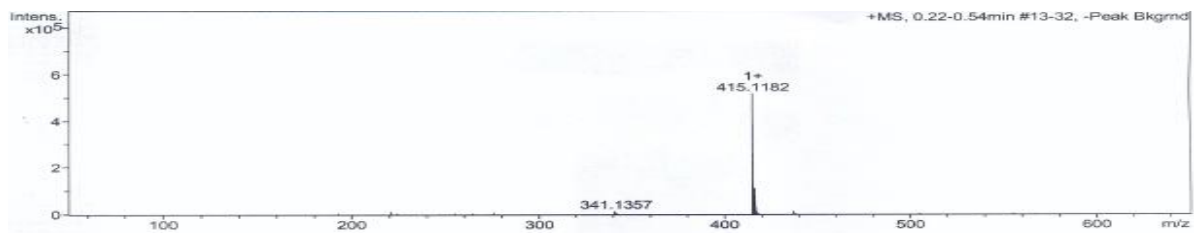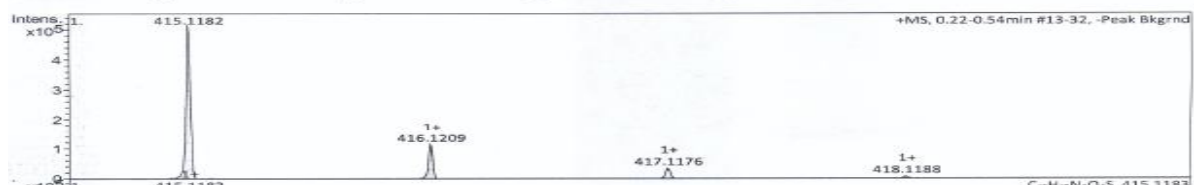

| Meas. m/z  | z  | # | Ion Formula                                                     | m/z        | err [ppm] | mSigma | rdb  | e <sup>-</sup> Conf |
|------------|----|---|-----------------------------------------------------------------|------------|-----------|--------|------|---------------------|
| 415.118172 | 1+ | 1 | C <sub>18</sub> H <sub>19</sub> N <sub>6</sub> O <sub>4</sub> S | 415.118301 | 0.3       | 8.1    | 12.5 | even                |

HRMS spectra of **6a**

2-(4-Bromophenyl)-3-[(1,3-dimethylxanthin-7-yl)acethamido]thiazolidine-4-one (6b)

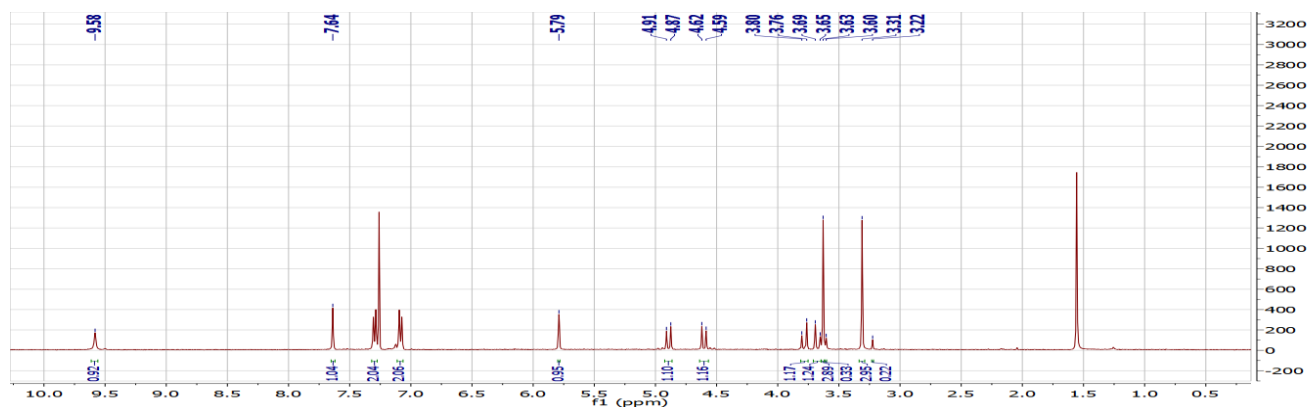

<sup>1</sup>H-RMN spectra of **6b**

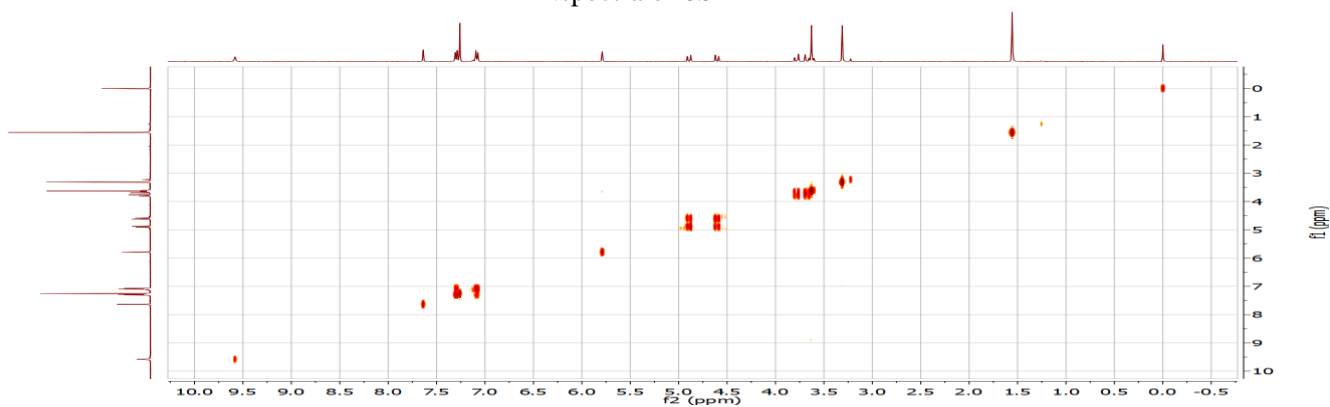

2D-COSY spectra of **6b**

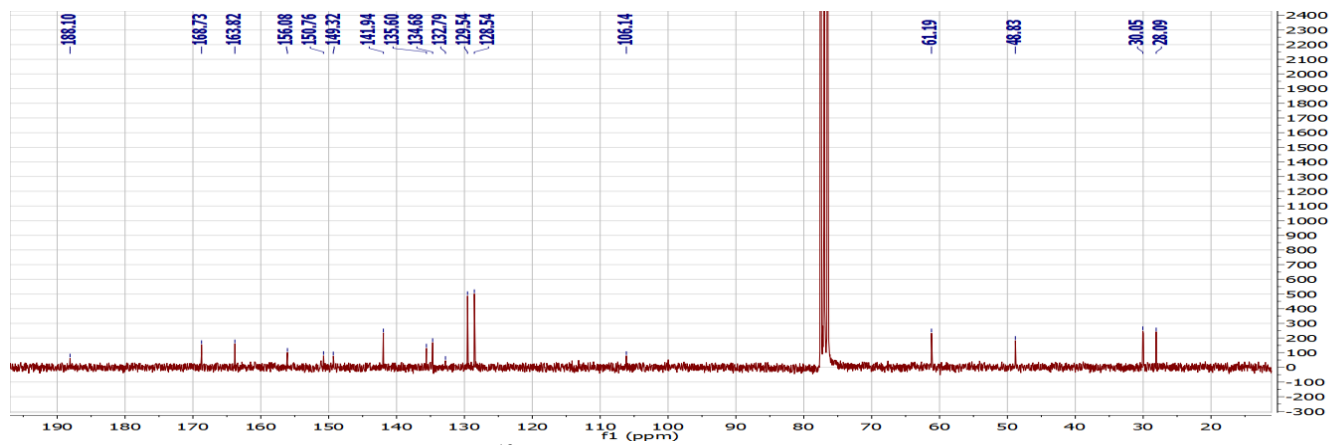

<sup>13</sup>C-RMN spectra of **6b**

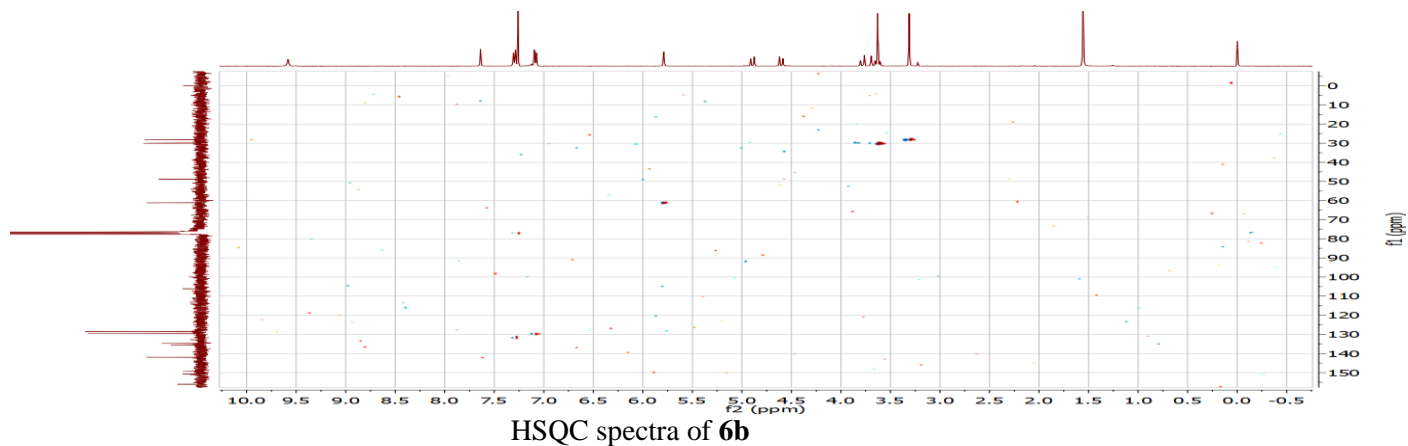

HSQC spectra of **6b**

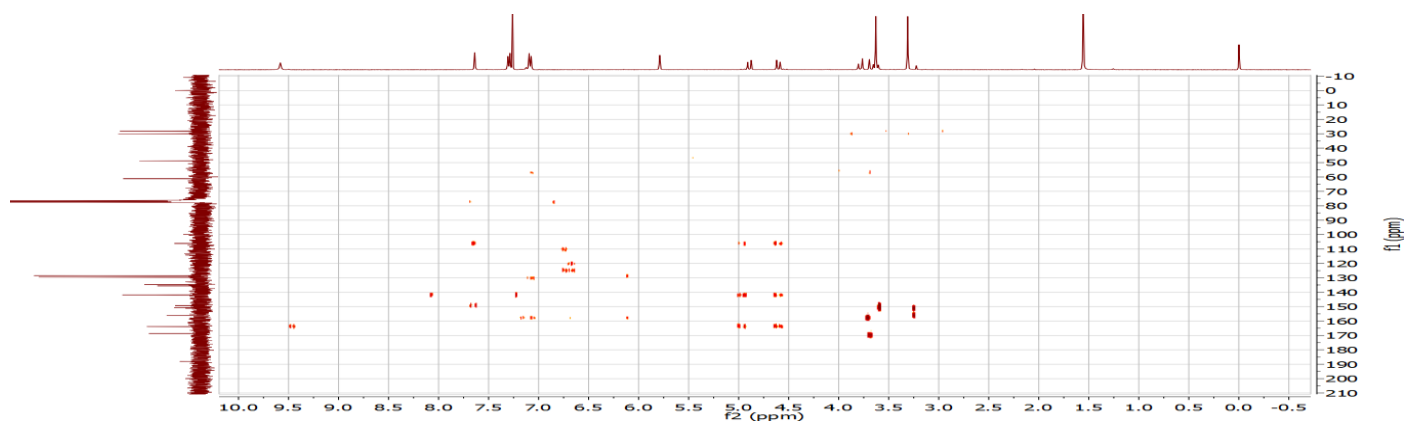

HMBC spectra of **6b**

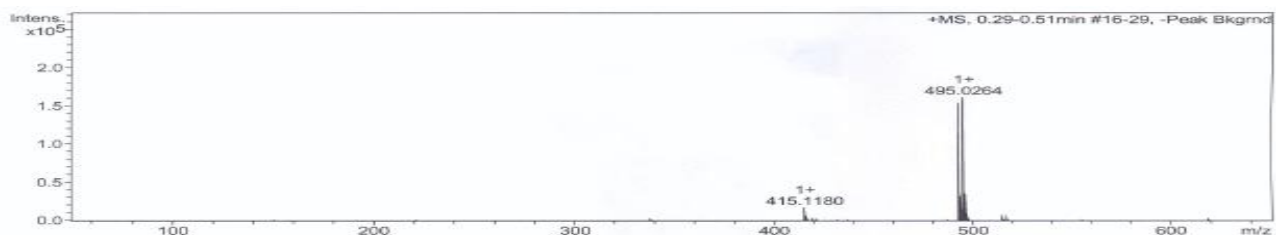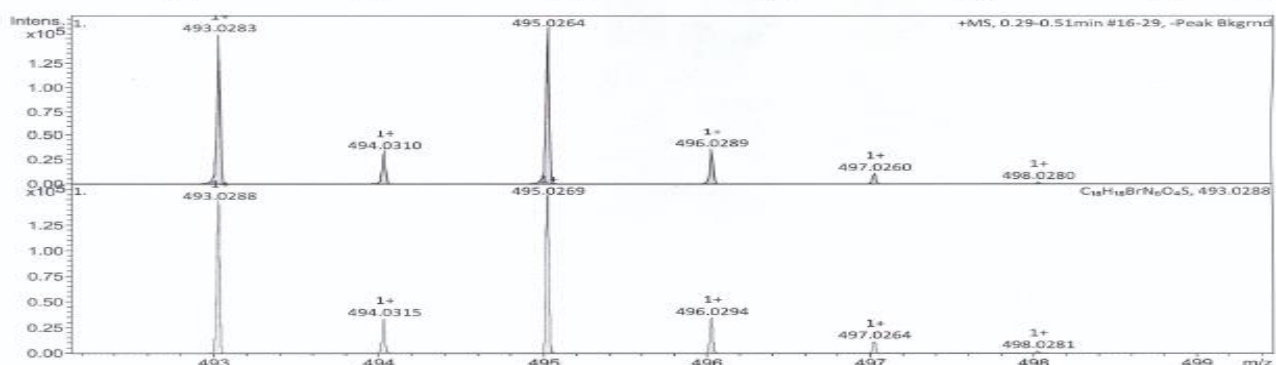

| Meas. m/z  | Z  | # | Ion Formula   | m/z        | err [ppm] | mSigma | rdb  | e <sup>-</sup> Conf |
|------------|----|---|---------------|------------|-----------|--------|------|---------------------|
| 493.028312 | 1+ | 1 | C18H18BrN6O4S | 493.028813 | 1.0       | 7.9    | 12.5 | even                |
|            | 1+ | 2 | C17H22BrN2O8S | 493.027475 | 1.7       | 9.7    | 7.5  | even                |

HRMS spectra of **6b**

2-(4-Chlorophenyl)-3-[(1,3-dimethylxanthin-7-yl)acetamido]thiazolidine-4-one (6c)

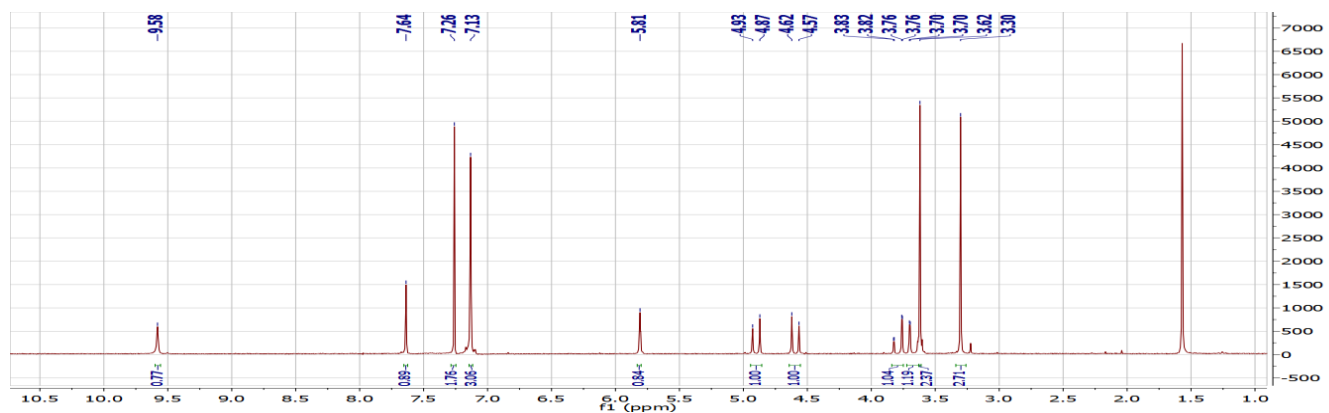

<sup>1</sup>H-RMN spectra of **6c**

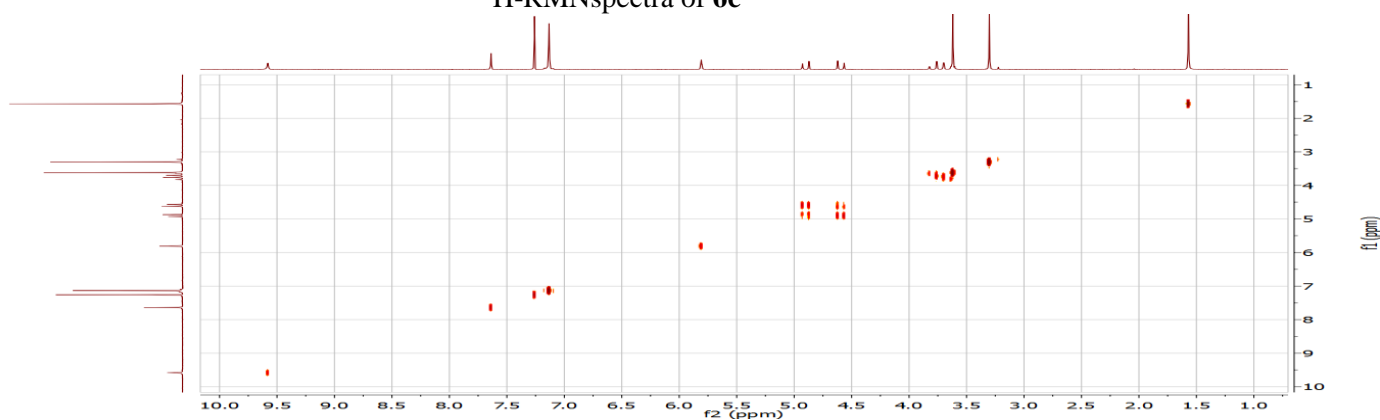

2D-COSY spectra of **6c**

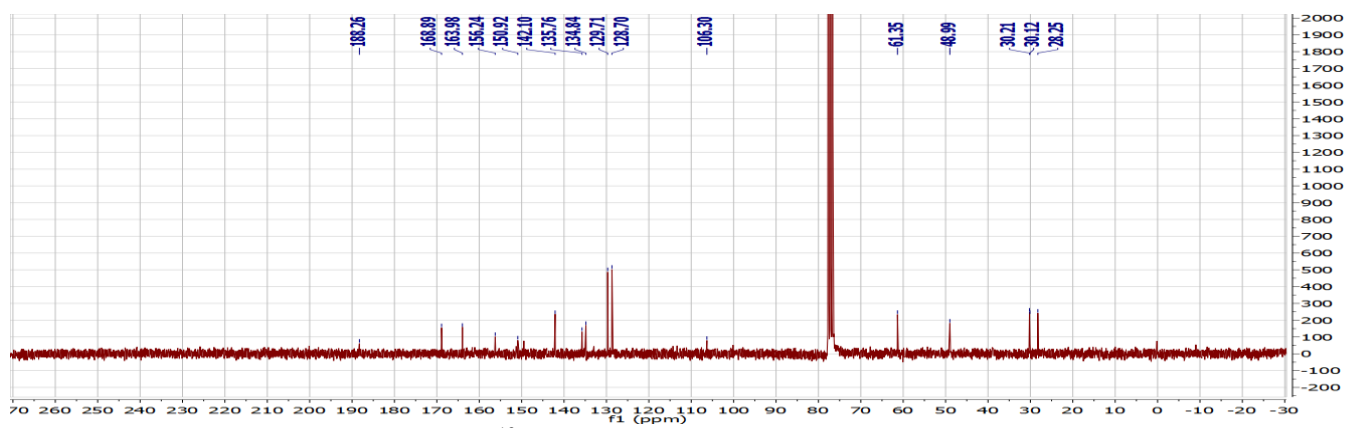

<sup>13</sup>C-RMN spectra of **6c**

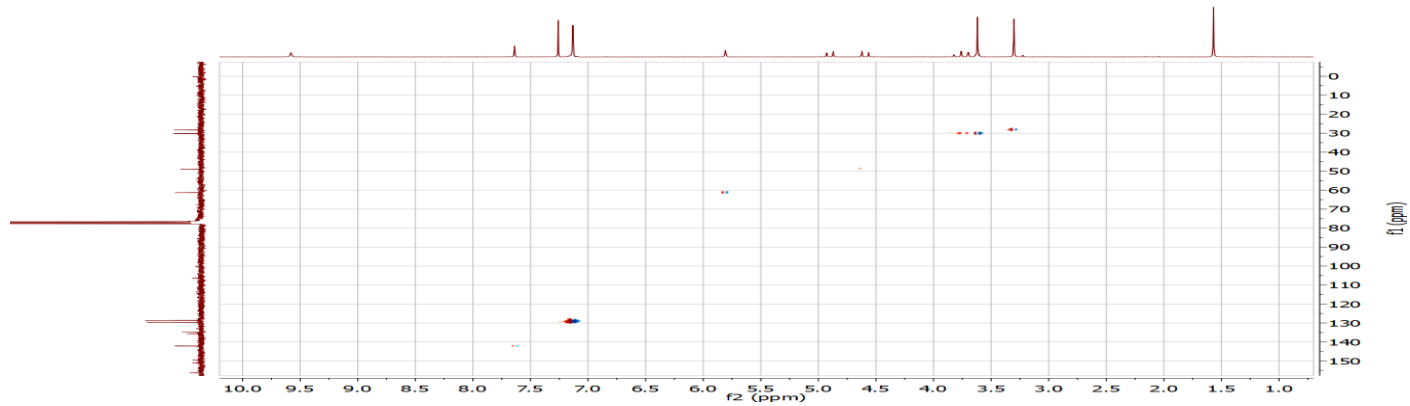

HSQC spectra of **6c**

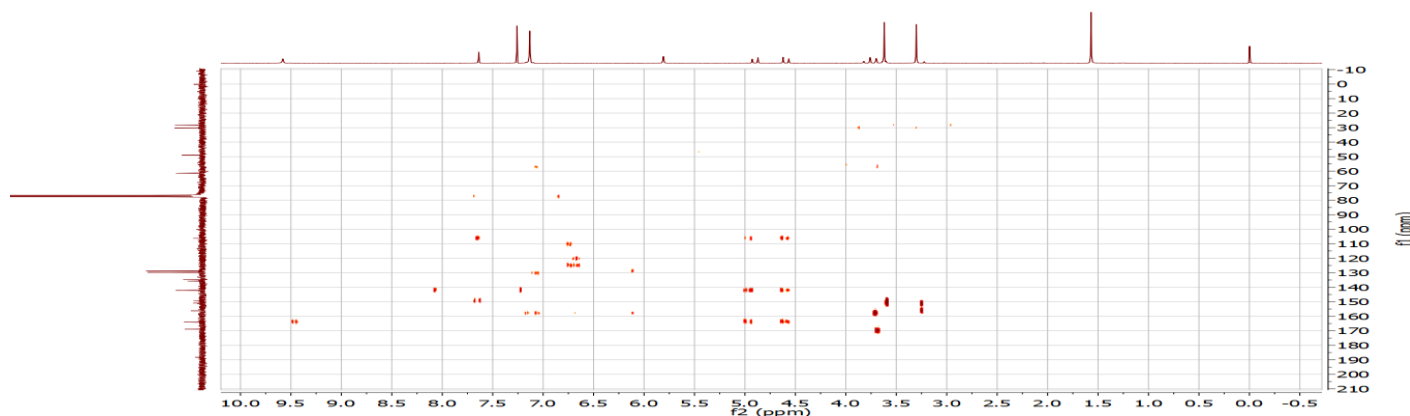

HMBC spectra of **6c**

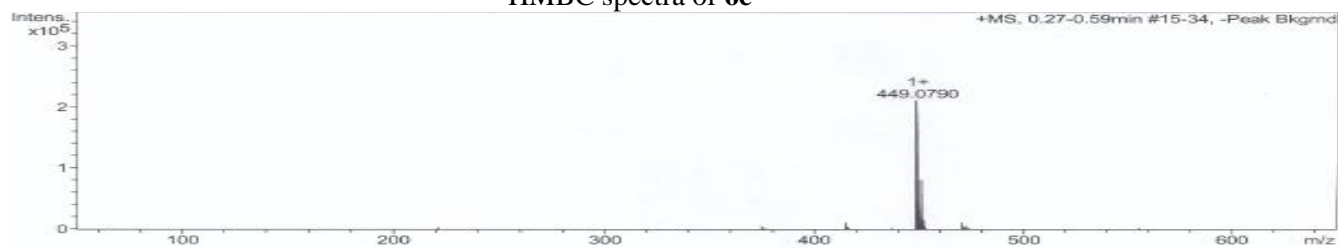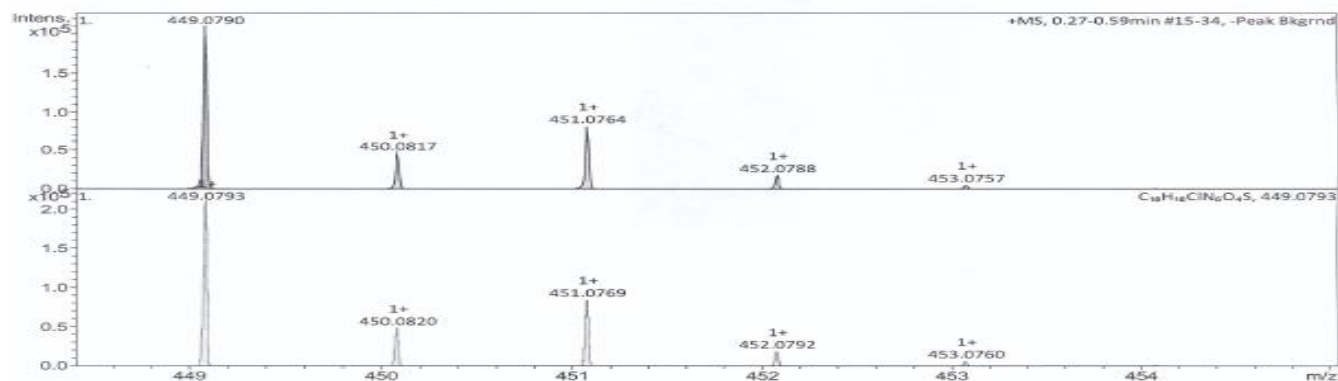

| Meas. m/z  | z  | # | Ion Formula   | m/z        | err [ppm] | mSigma | rdb  | e <sup>-</sup> Conf |
|------------|----|---|---------------|------------|-----------|--------|------|---------------------|
| 415.117995 | 1+ | 1 | C18H19N6O4S   | 415.118301 | 0.7       | 13.1   | 12.5 | even                |
| 449.079004 | 1+ | 1 | C18H18ClN6O4S | 449.079328 | -0.7      | 7.8    | 12.5 | even                |

HRMS spectra of **6c**

2-(4-Fluorophenyl)-3-[(1,3-dimethylxanthin-7-yl)acethamido]thiazolidine-4-one (6d)

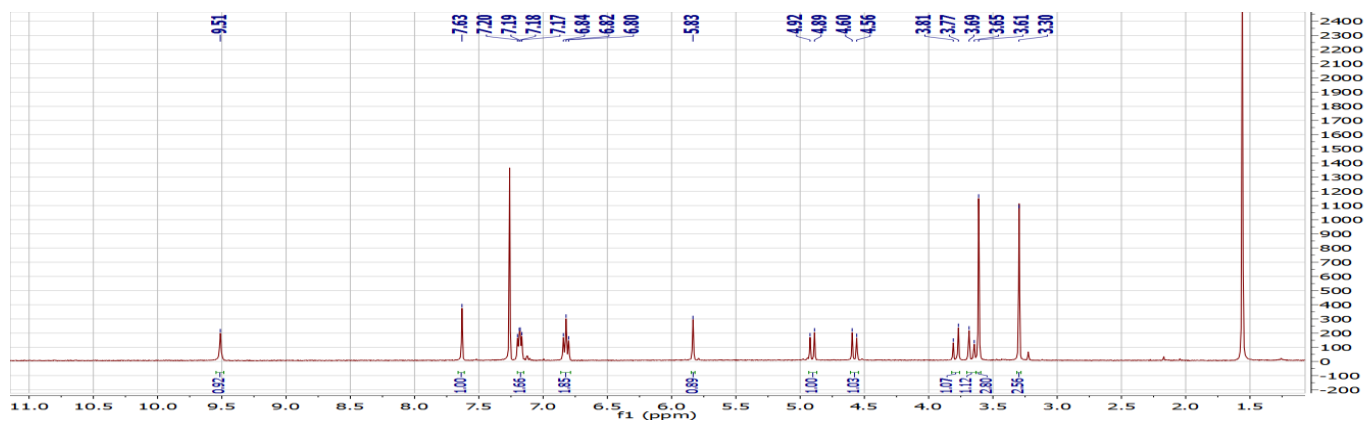

<sup>1</sup>H-RMN spectra of **6d**

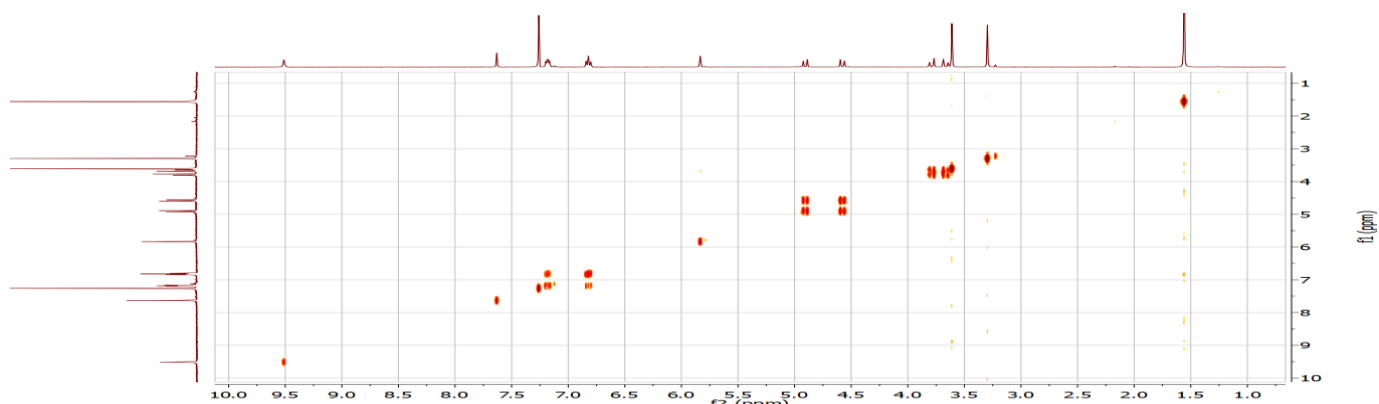

2D-COSY spectra of **6d**

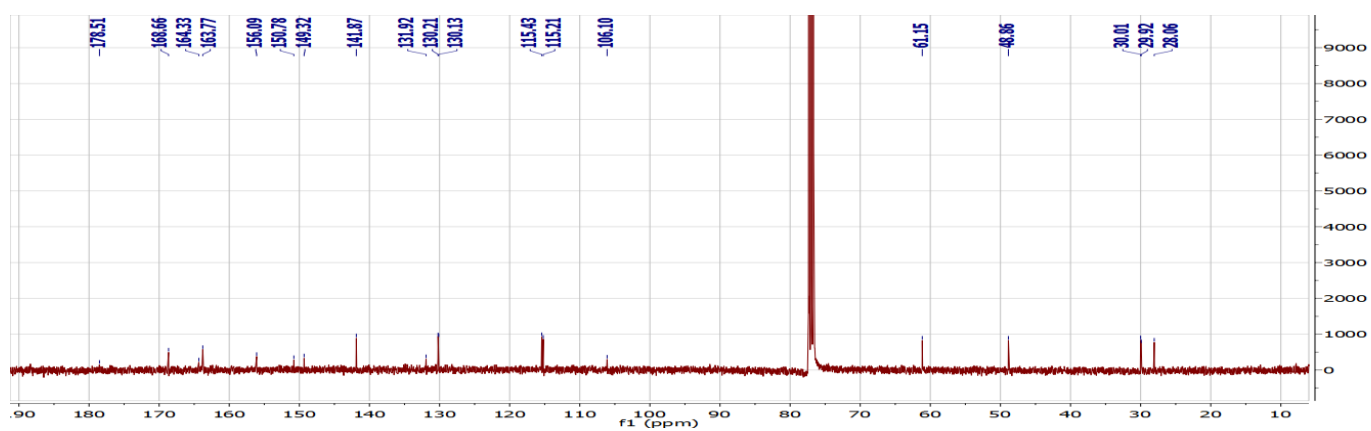

<sup>13</sup>C-RMN spectra of **6d**

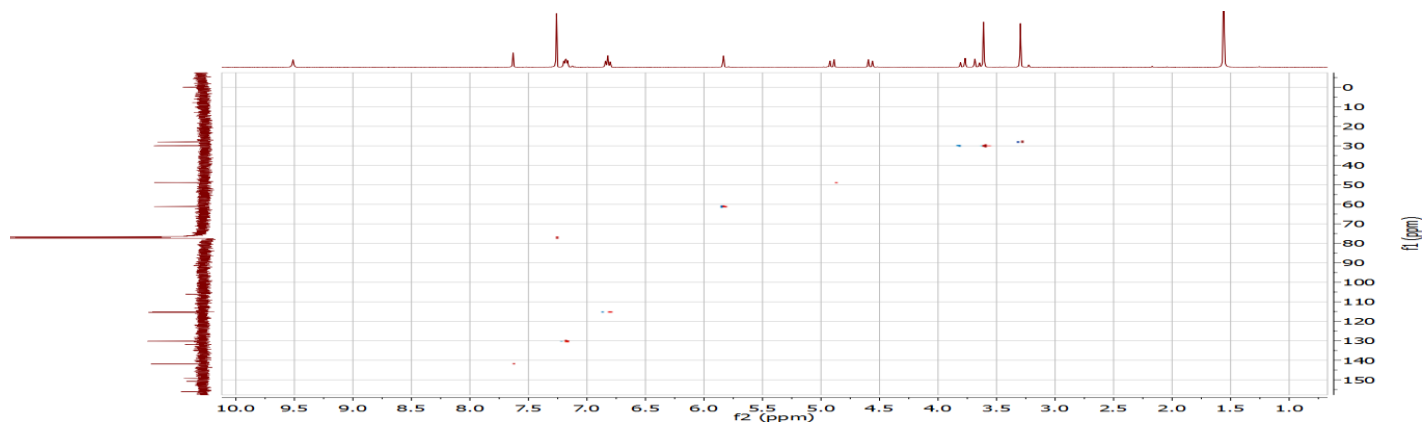

HSQC spectra of **6d**

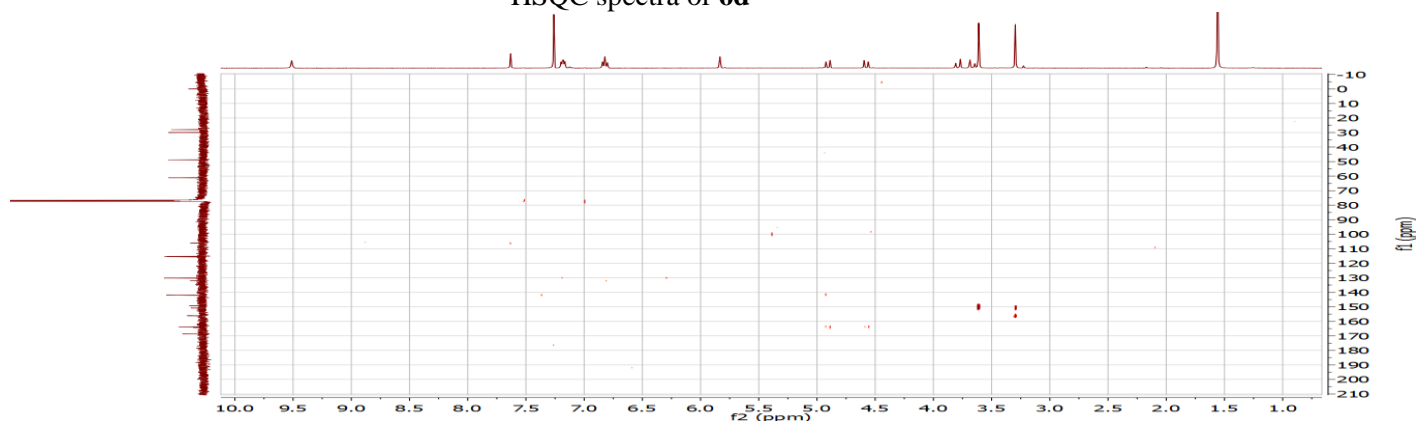

HMBC spectra of **6d**

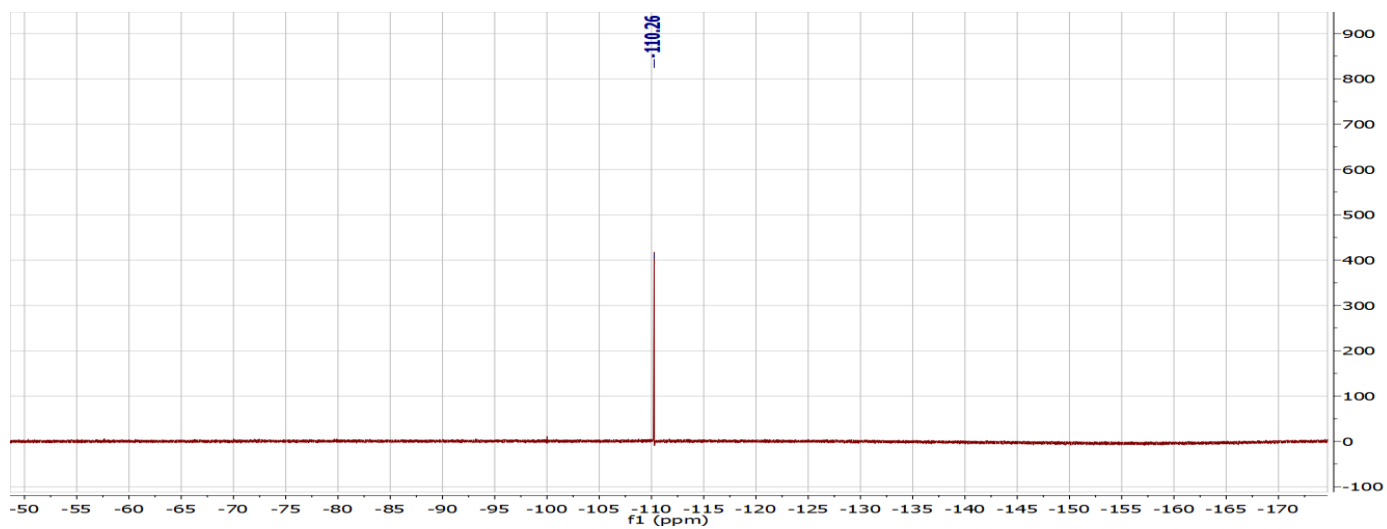

$^{19}\text{F}$ -RMN spectra of **6f**



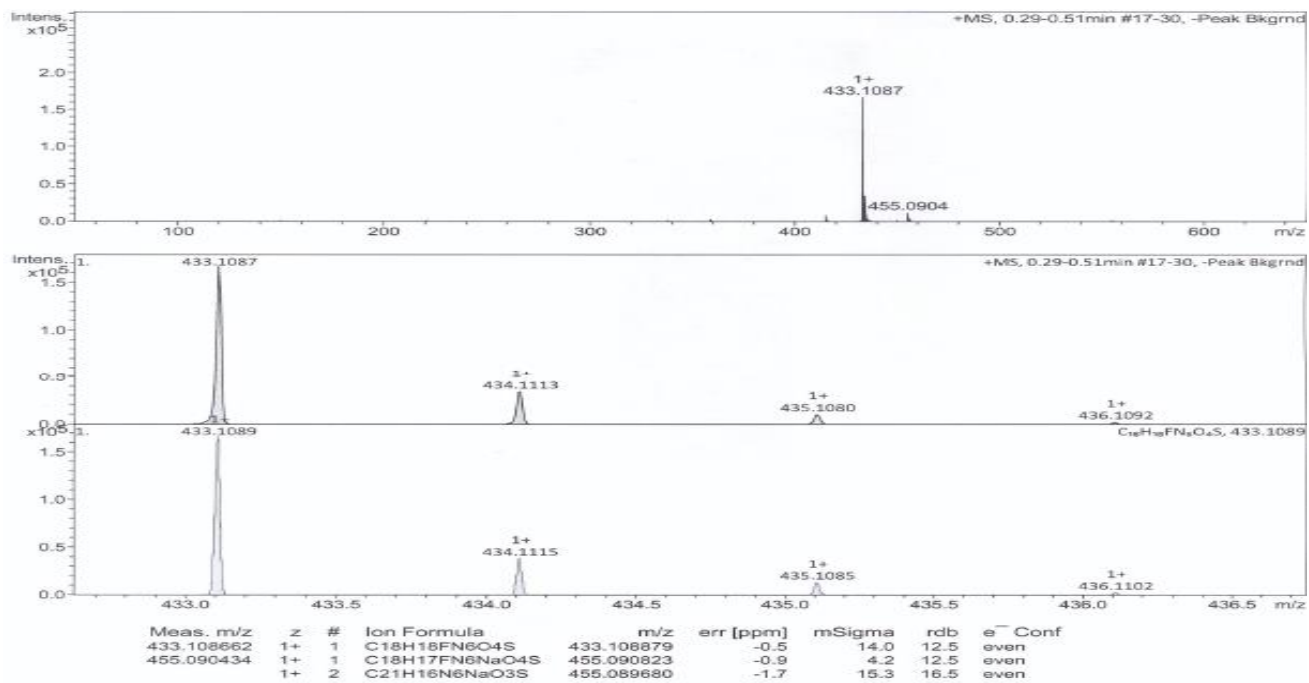

2-(2-Methoxyphenyl)-3-[(1,3-dimethylxanthin-7-yl)acetamido]thiazolidine-4-one (6e)

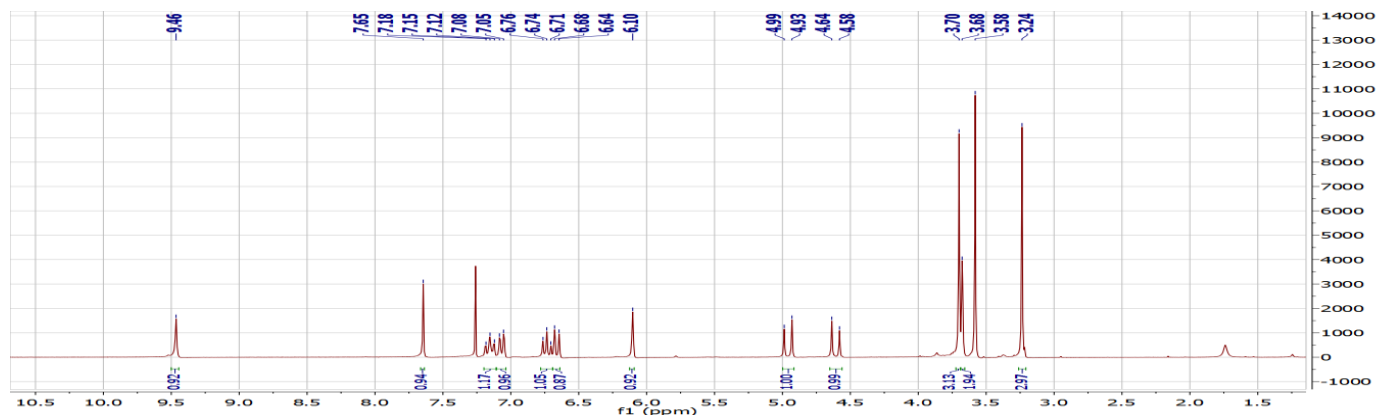

<sup>1</sup>H-RMN spectra of **6e**

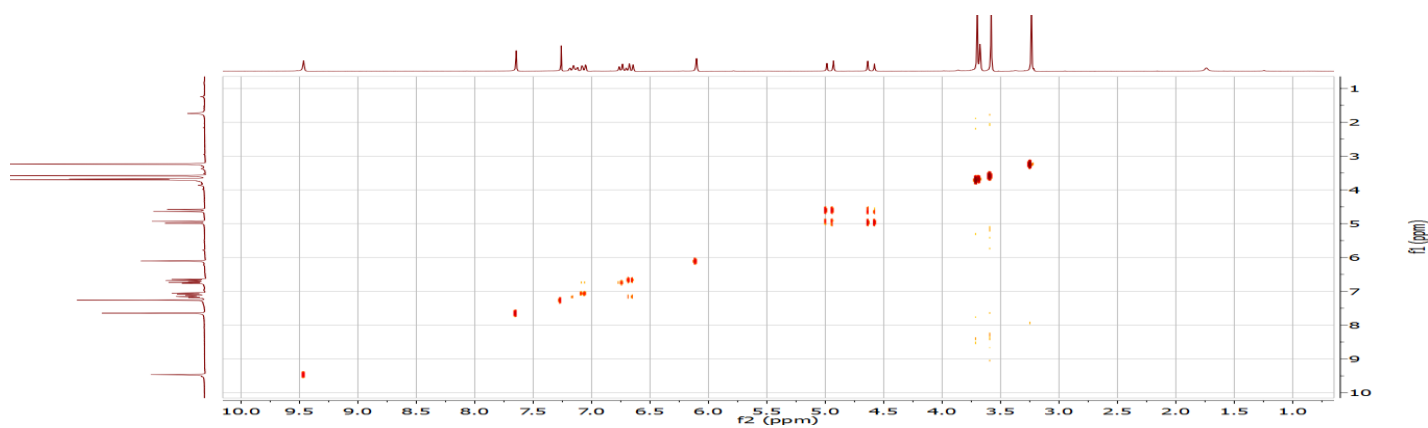

2D-COSY spectra of **6e**

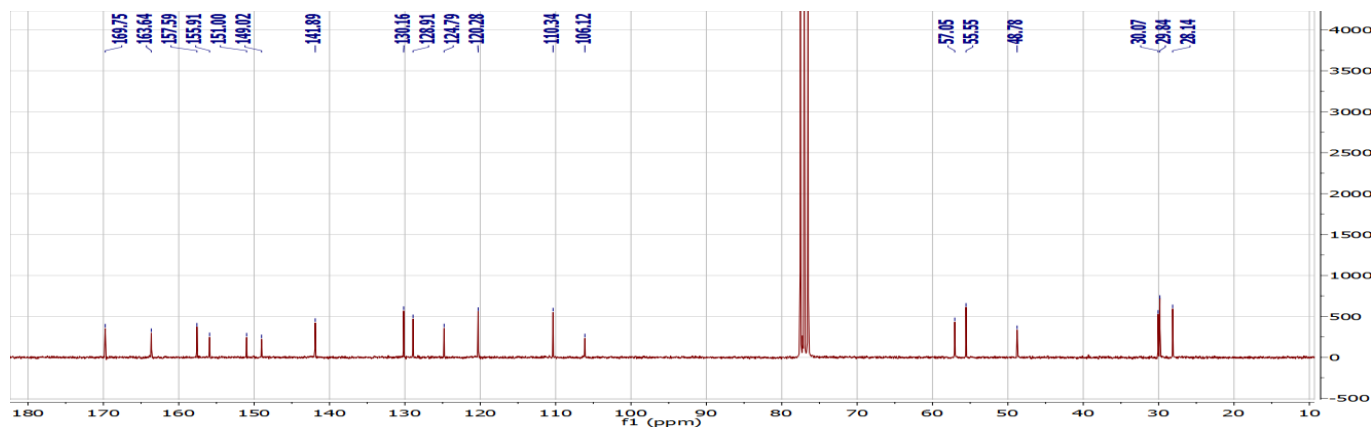

<sup>13</sup>C-RMN spectra of **6e**

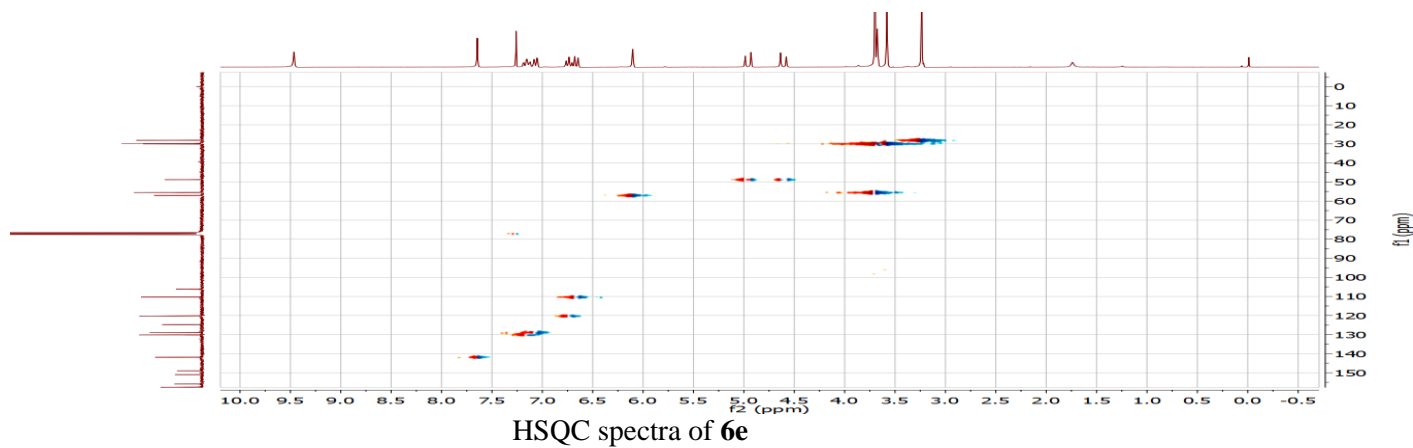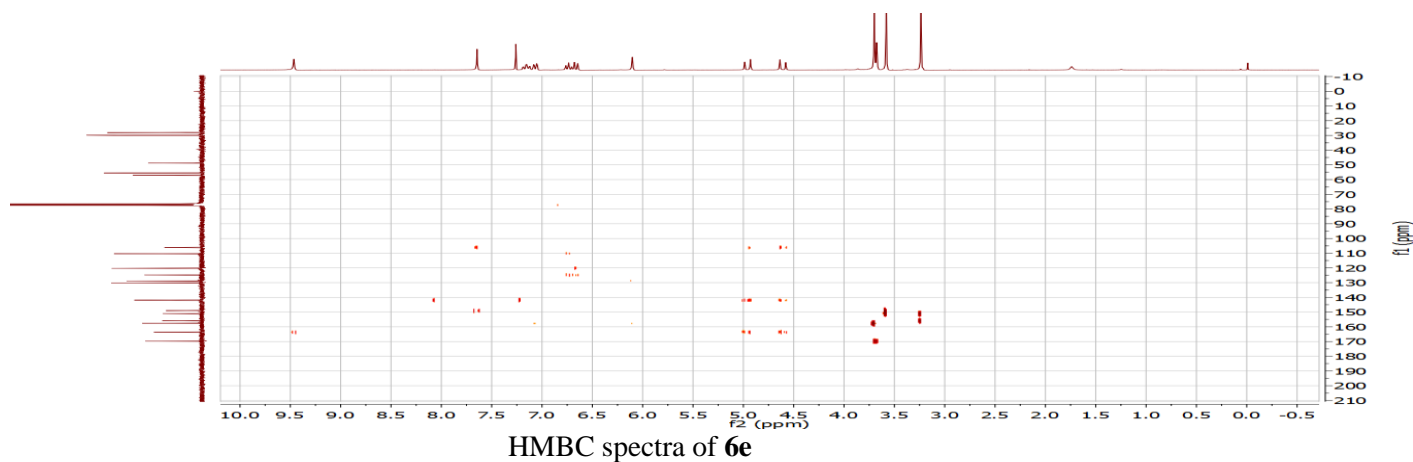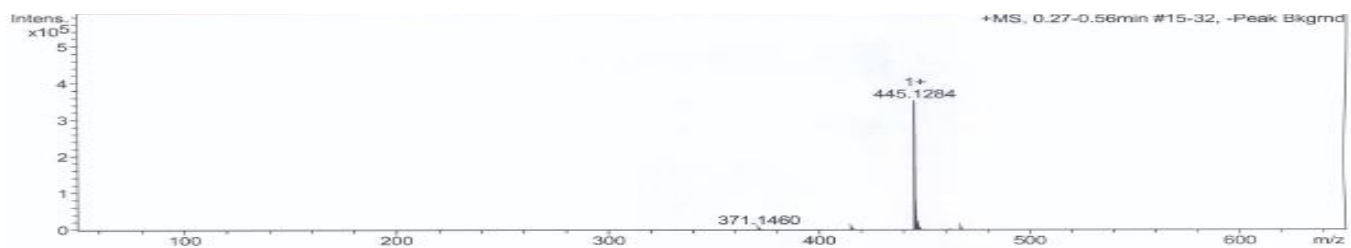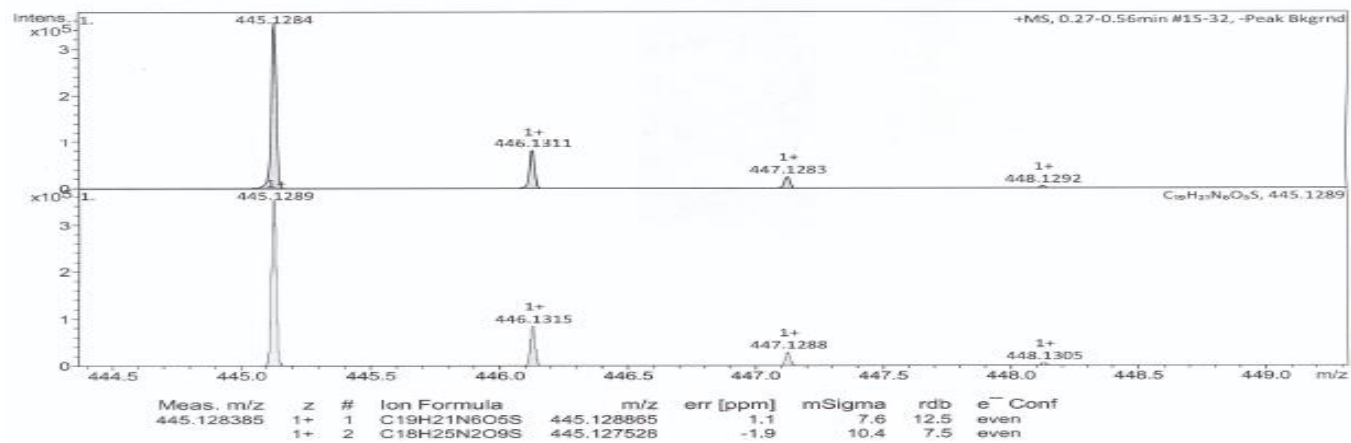

HRMS spectra of **6e**

*2-(4-Methoxyphenyl)-3-[(1,3-dimethylxanthin-7-yl)acethamido]thiazolidine-4-one (6f)*

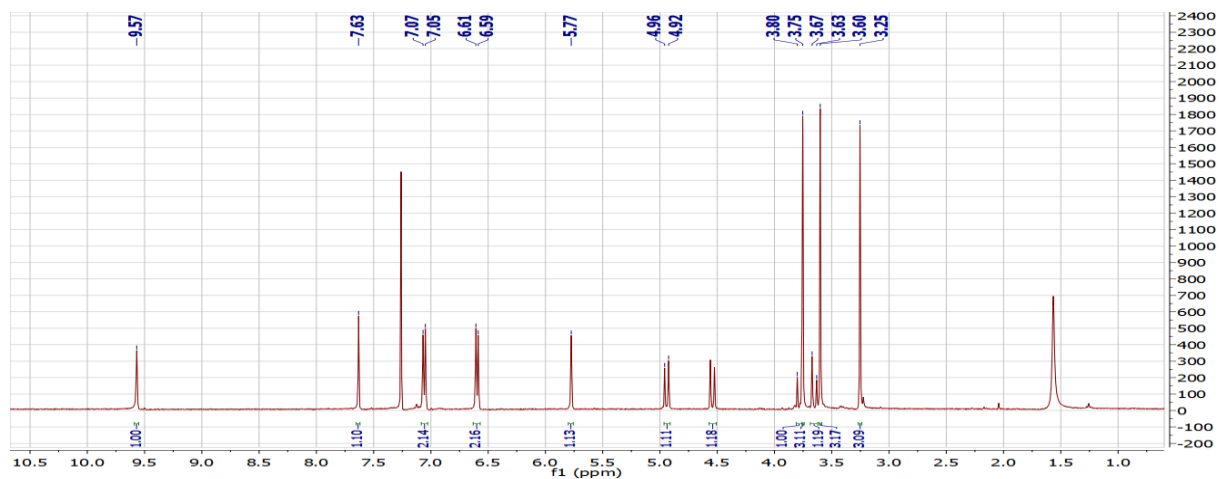

<sup>1</sup>H-RMN spectra of **6f**

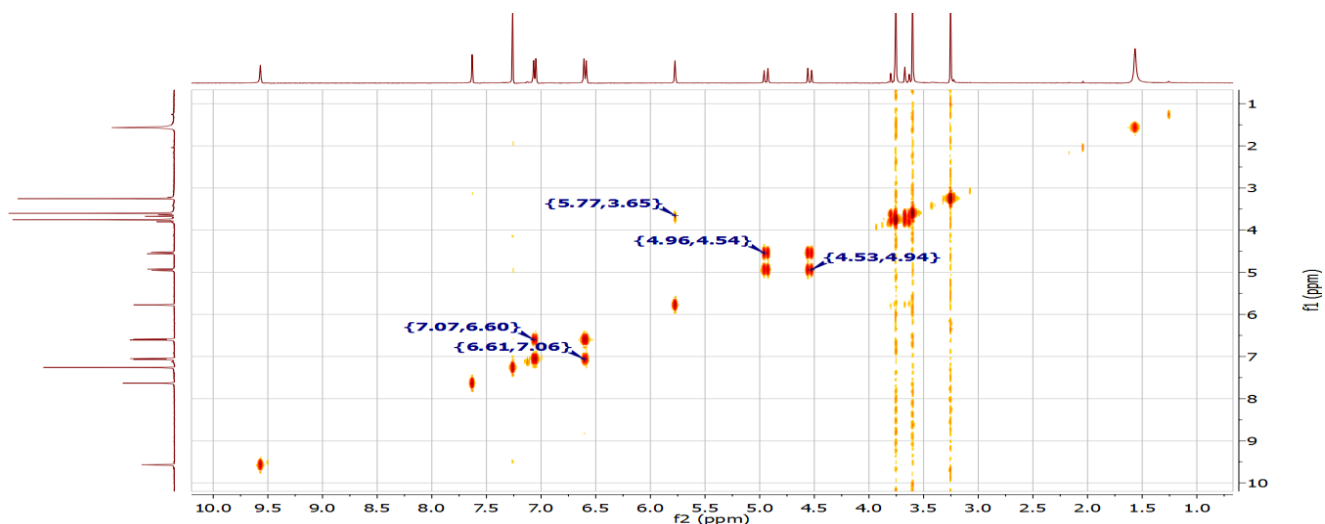

2D-COSY spectra of **6f**

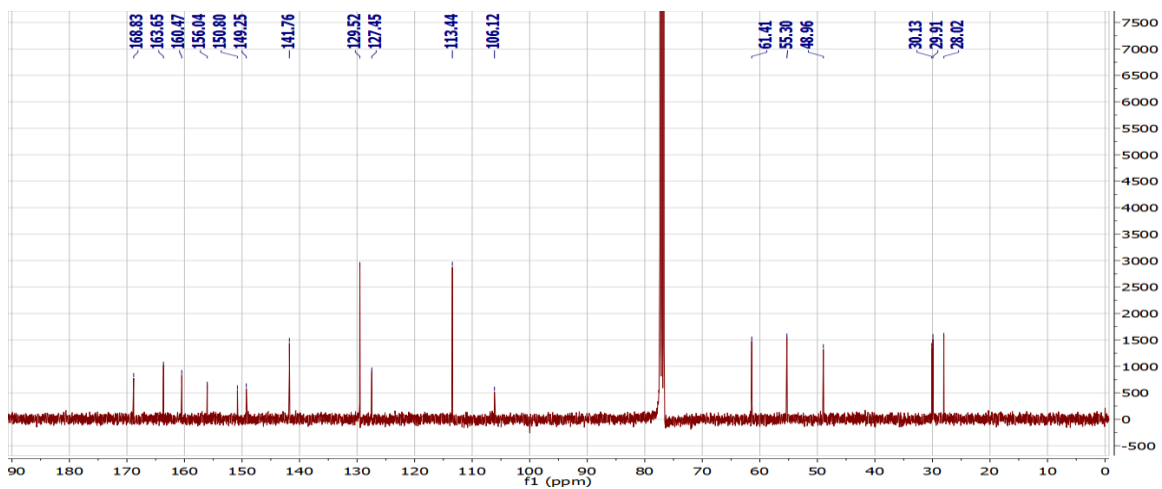

<sup>13</sup>C-RMN spectra of **6f**

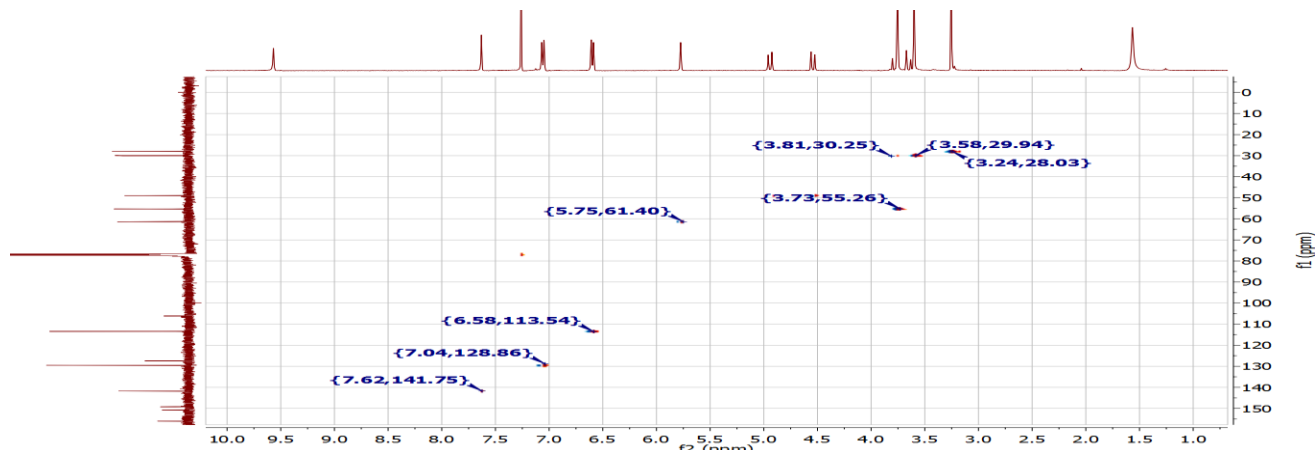

HSQC spectra of **6f**

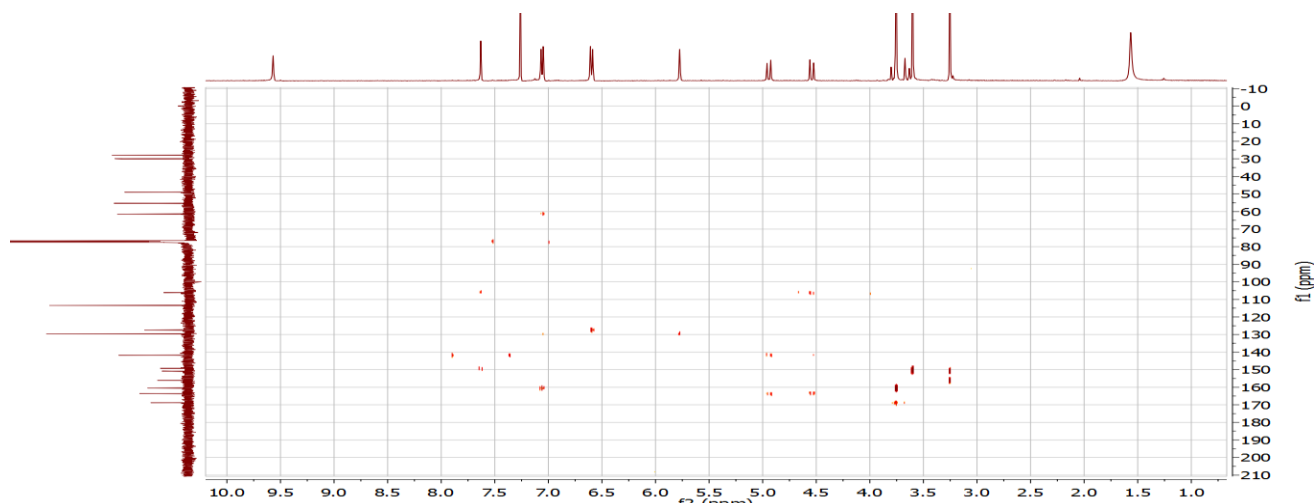

HMBC spectra of **6f**

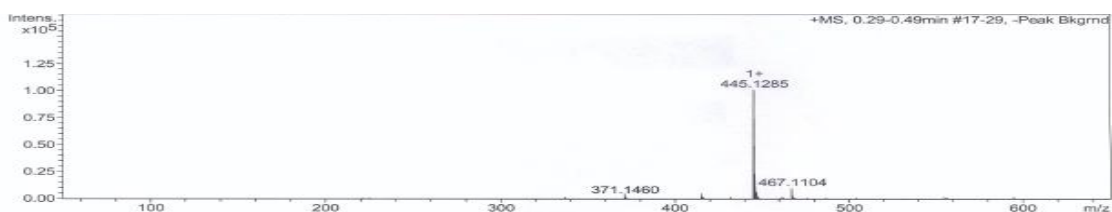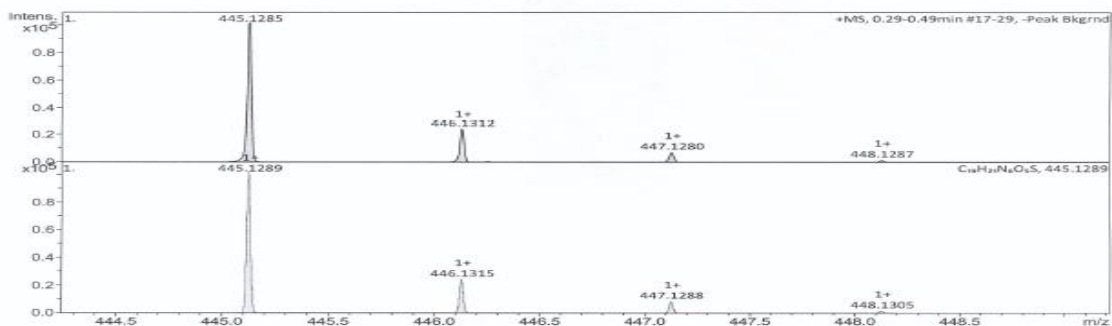

| Meas. m/z  | z  | # | Ion Formula                                                       | m/z        | err [ppm] | mSigma | rdb  | e <sup>-</sup> Conf |
|------------|----|---|-------------------------------------------------------------------|------------|-----------|--------|------|---------------------|
| 445.128533 | 1+ | 1 | C <sub>19</sub> H <sub>21</sub> N <sub>6</sub> O <sub>5</sub> S   | 445.128865 | 0.7       | 7.8    | 12.5 | even                |
| 467.110416 | 1+ | 1 | C <sub>19</sub> H <sub>20</sub> N <sub>6</sub> NaO <sub>5</sub> S | 467.110609 | -0.8      | 4.3    | 12.5 | even                |

HRMS spectra for **6f**

2-(3-Methoxyphenyl)-3-[(1,3-dimethylxanthin-7-yl)acetamido]thiazolidine-4-one (6g)

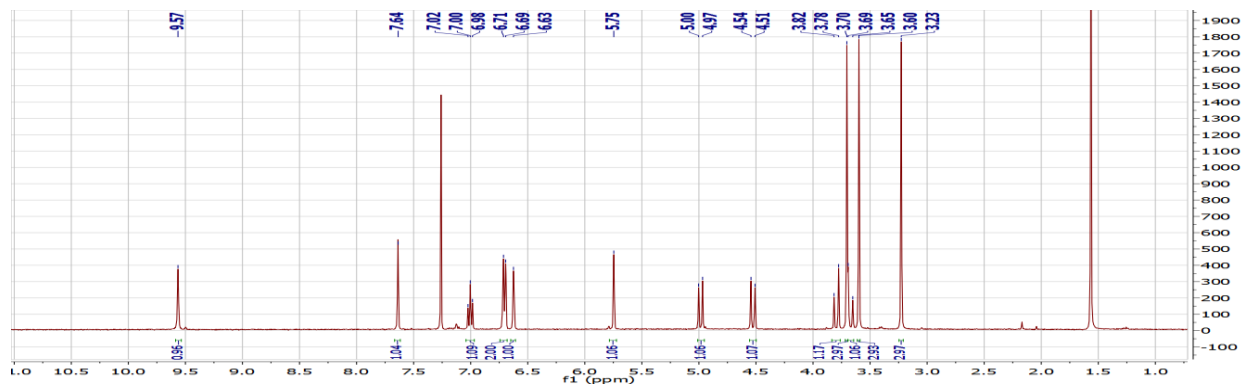

<sup>1</sup>H-RMN spectra of 6g

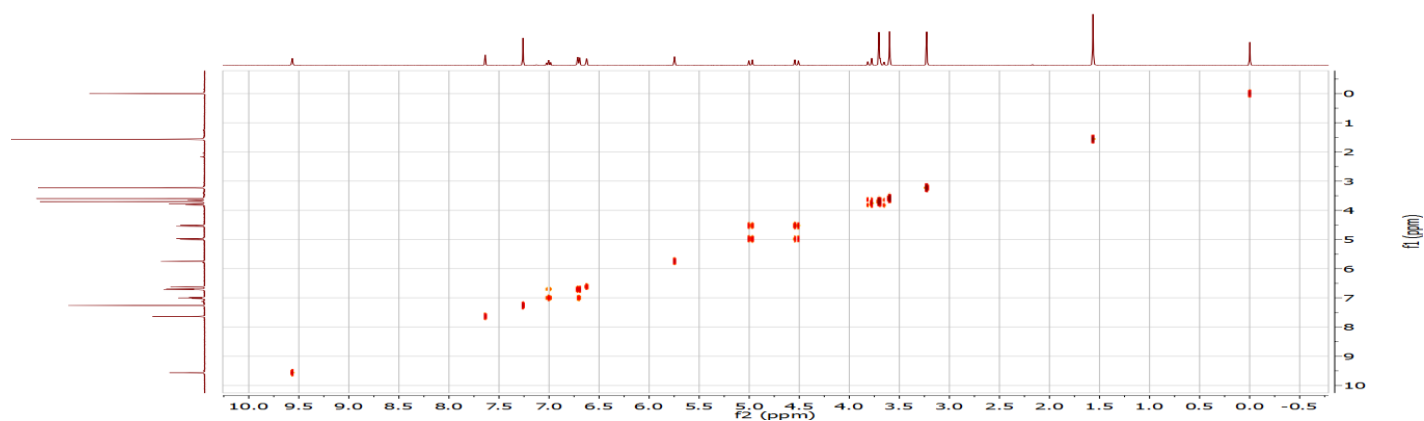

2D-COSY spectra of 6g

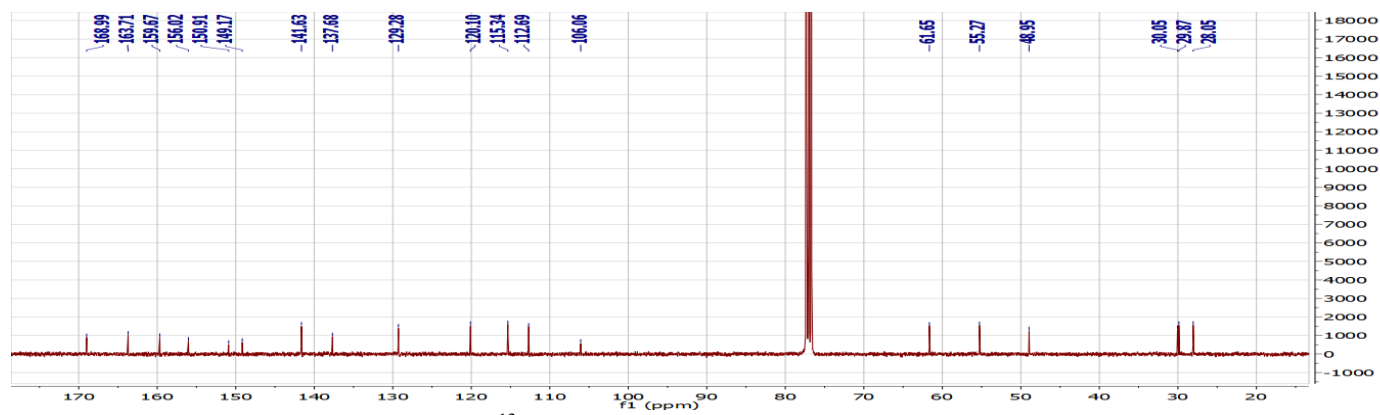

<sup>13</sup>C-RMN spectra of 6g

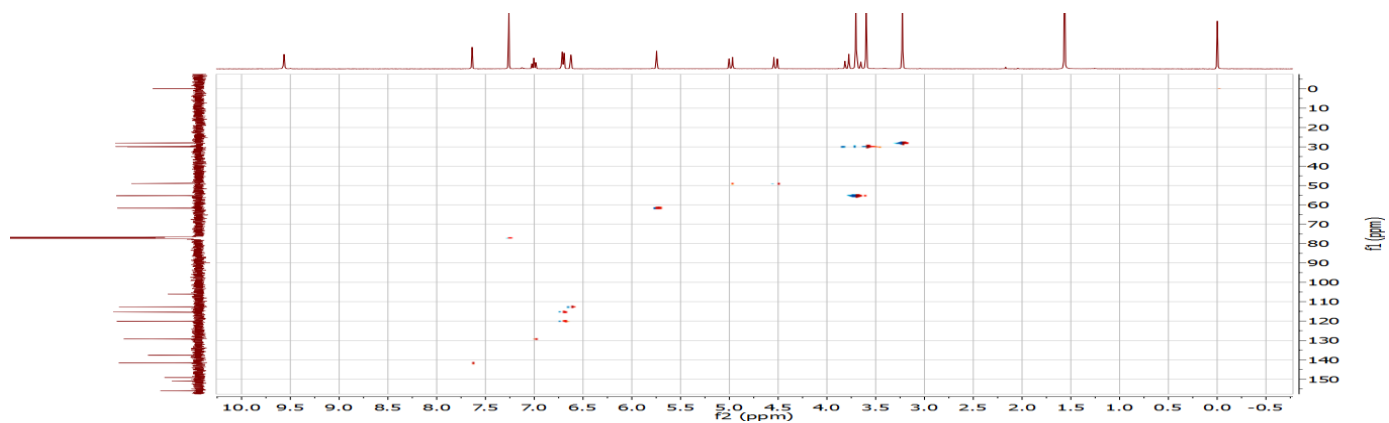

HSQC spectra of **6g**

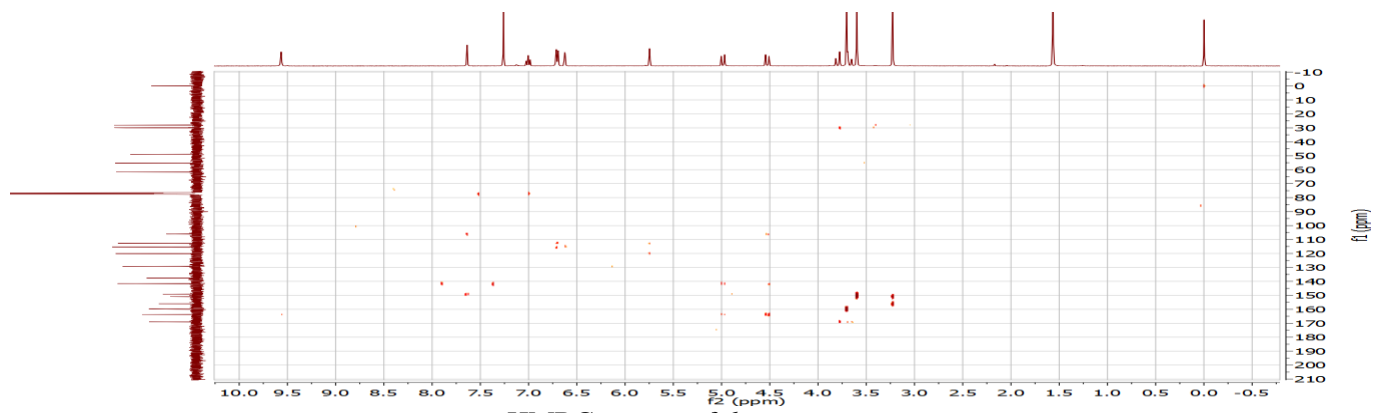

HMBC spectra of **6g**

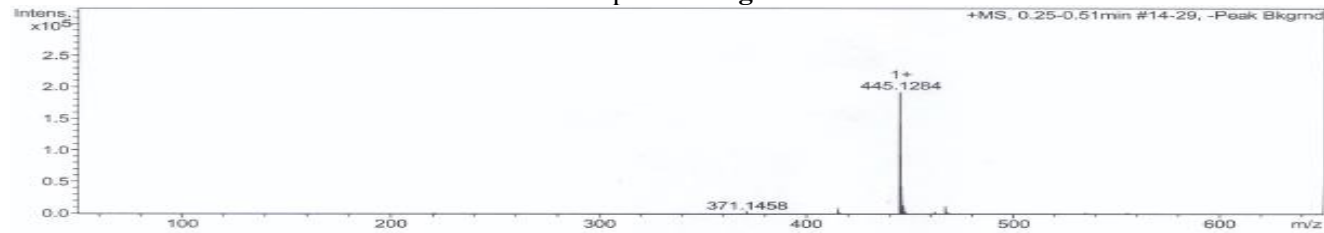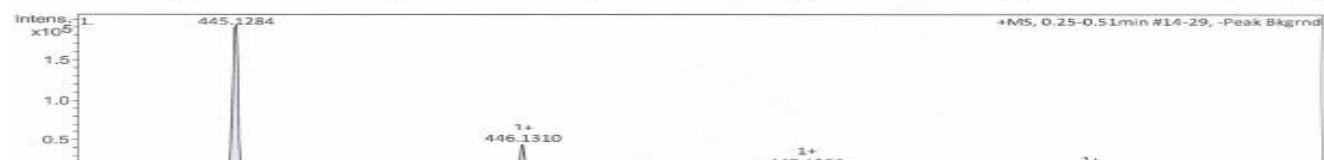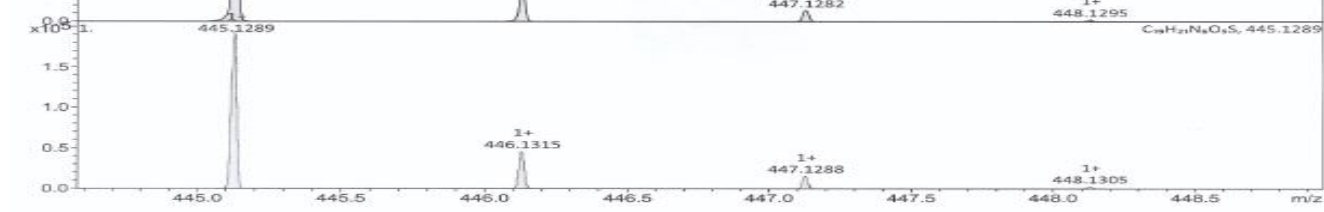

| Meas. m/z  | z  | # | Ion Formula                                                       | m/z        | err [ppm] | mSigma | rdb  | e <sup>-</sup> Conf |
|------------|----|---|-------------------------------------------------------------------|------------|-----------|--------|------|---------------------|
| 445.128366 | 1+ | 1 | C <sub>19</sub> H <sub>21</sub> N <sub>6</sub> O <sub>5</sub> S   | 445.128865 | -1.1      | 7.5    | 12.5 | even                |
| 467.110205 | 1+ | 2 | C <sub>18</sub> H <sub>25</sub> N <sub>2</sub> O <sub>9</sub> S   | 445.127528 | -1.9      | 10.0   | 7.5  | even                |
|            | 1+ | 1 | C <sub>18</sub> H <sub>24</sub> N <sub>2</sub> NaO <sub>9</sub> S | 467.109472 | 1.6       | 12.2   | 7.5  | even                |
|            | 1+ | 2 | C <sub>19</sub> H <sub>20</sub> N <sub>6</sub> NaO <sub>5</sub> S | 467.110809 | 1.3       | 16.0   | 12.5 | even                |

HRMS spectra of **6g**

2-(2,3-Dimethoxyphenyl)-3-[(1,3-dimethylxanthin-7-yl)acetamido]thiazolidine-4-one (6h)

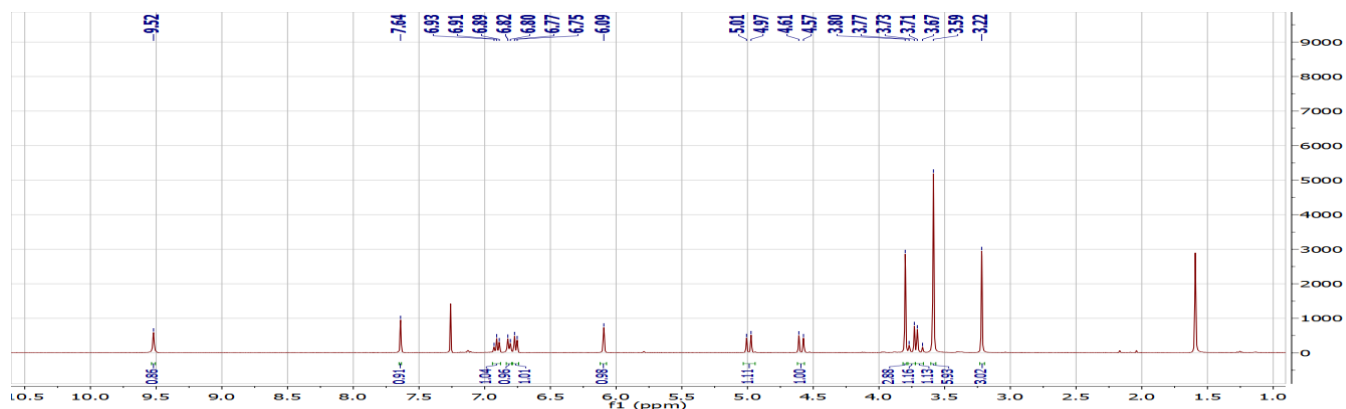

<sup>1</sup>H-RMN spectra of **6h**

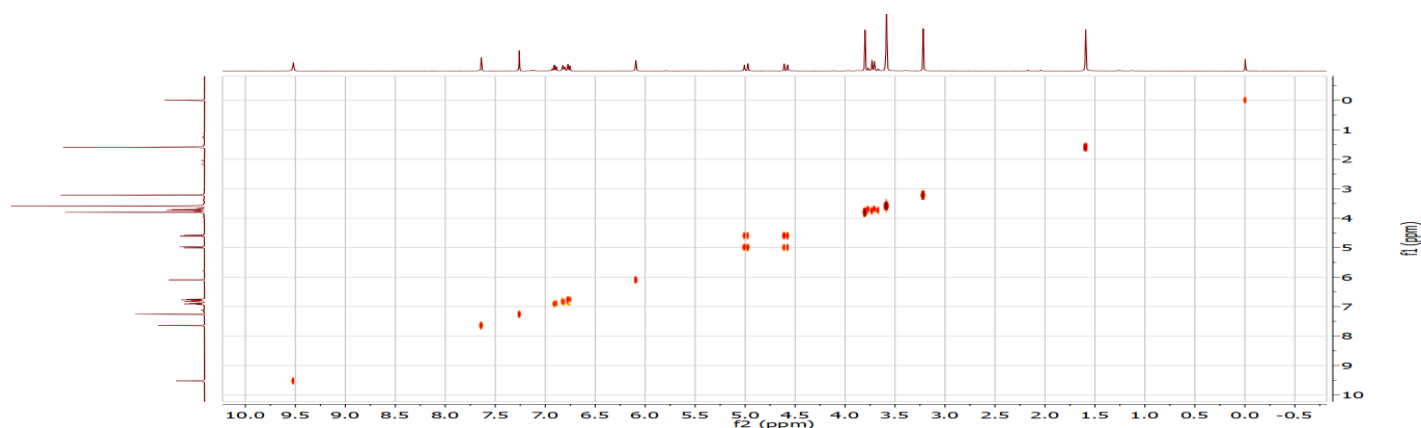

2D-COSY spectra of **6h**

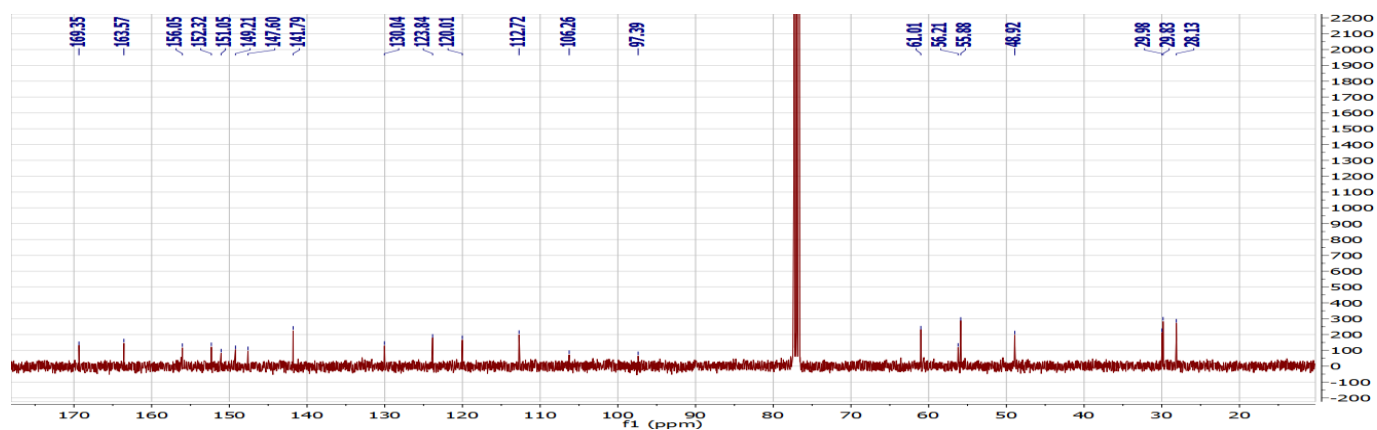

<sup>13</sup>C-RMN spectra of **6h**



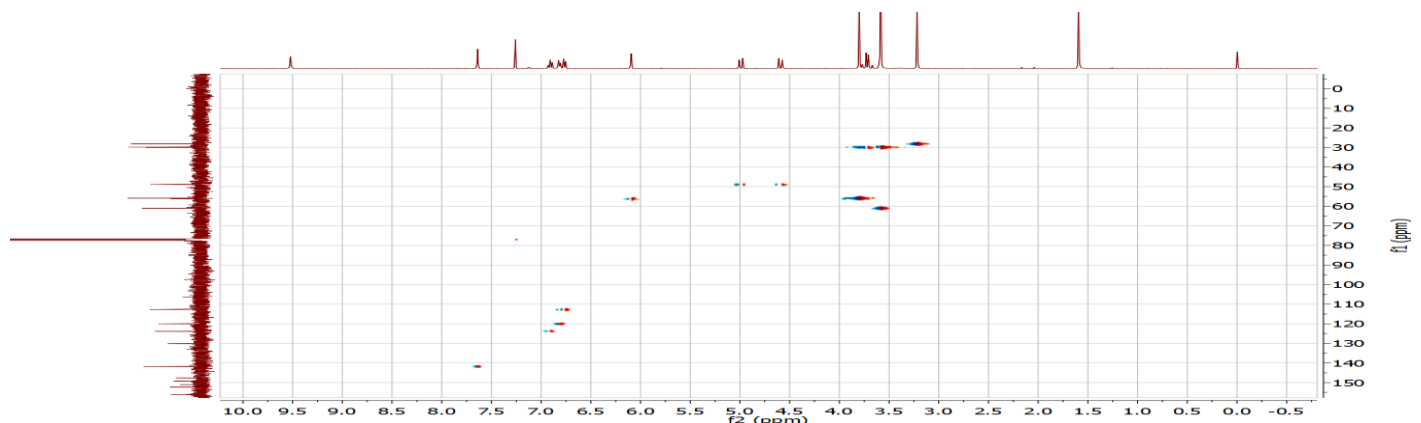

HSQC spectra of **6h**

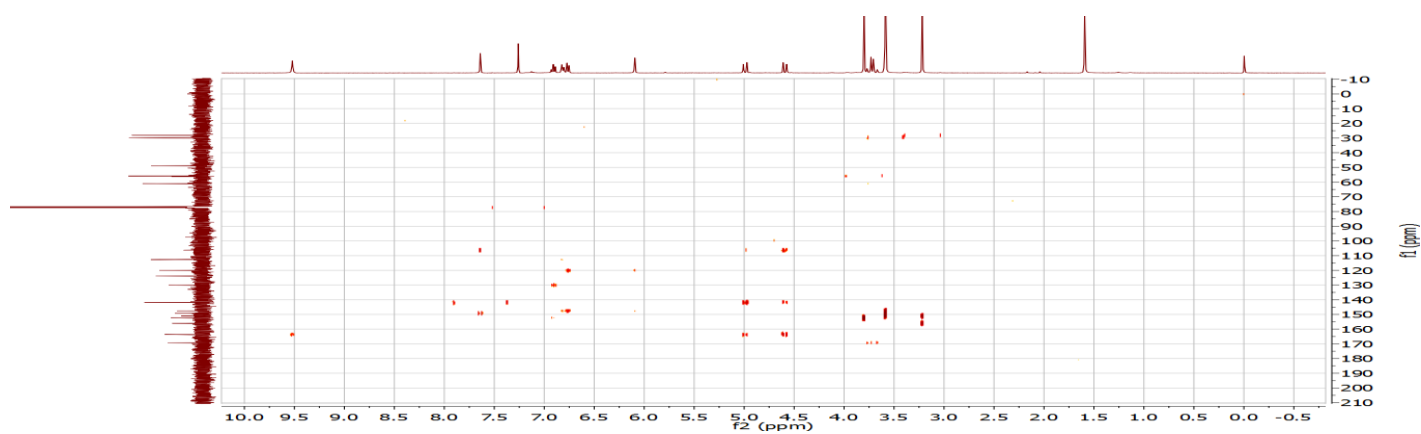

HMBC spectra of **6h**

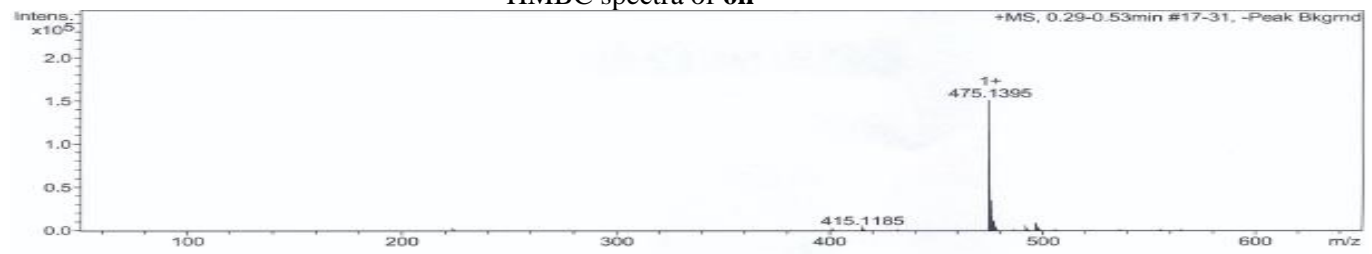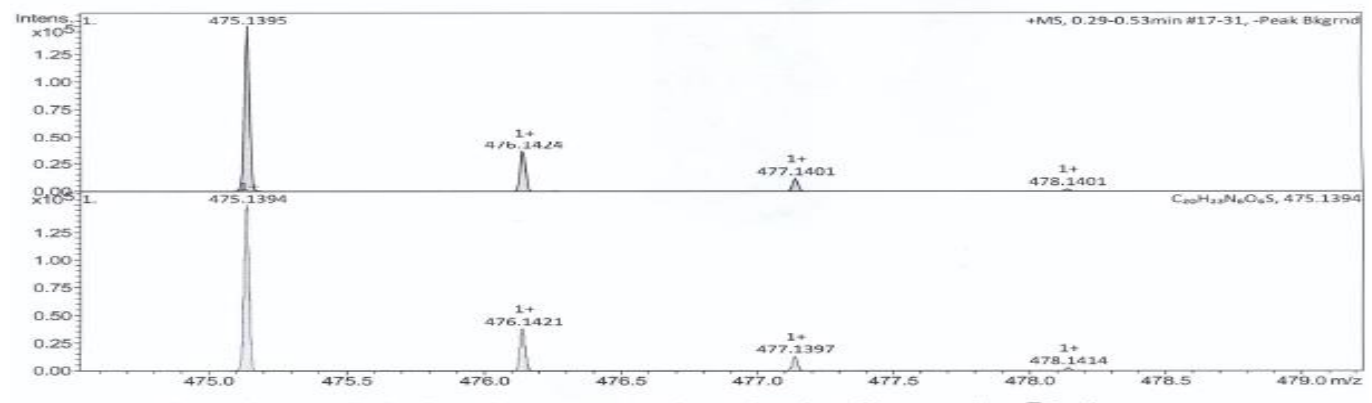

| Meas. m/z  | z  | # | Ion Formula   | m/z        | err [ppm] | mSigma | rdb  | e <sup>-</sup> Conf |
|------------|----|---|---------------|------------|-----------|--------|------|---------------------|
| 415.118514 | 1+ | 1 | C18H19N6O4S   | 415.118301 | 0.5       | 12.7   | 12.5 | even                |
| 475.139544 | 1+ | 1 | C20H23N6O6S   | 475.139430 | -0.2      | 9.5    | 12.5 | even                |
| 497.121583 | 1+ | 1 | C20H22N6NaO6S | 497.121374 | -0.4      | 11.9   | 12.5 | even                |

HRMS spectra of **6h**

*2-(2,4-Dimethoxyphenyl)-3-[(1,3-dimethylxanthin-7-yl)acethamido]thiazolidine-4-one (6i)*

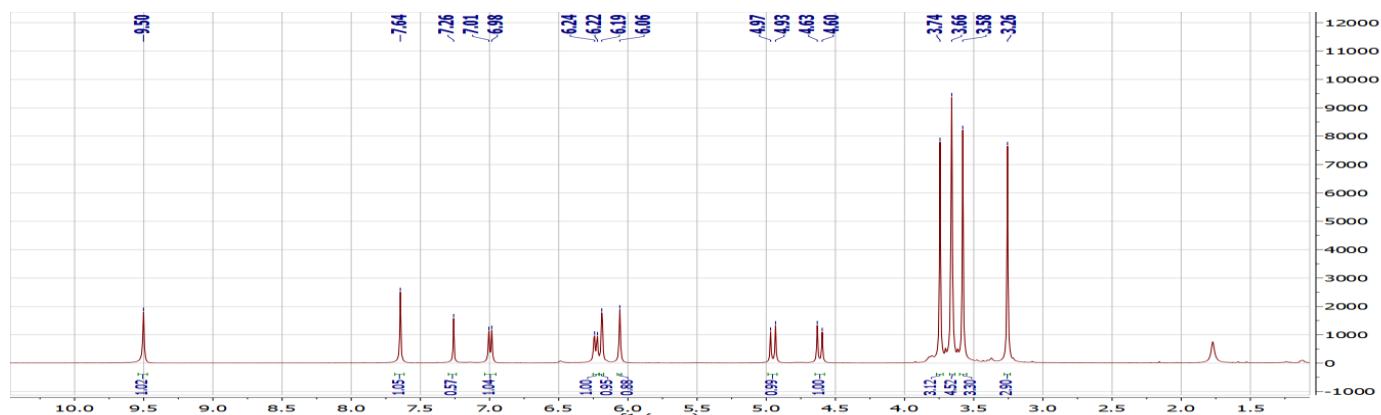

<sup>1</sup>H-RMN spectra of **6i**

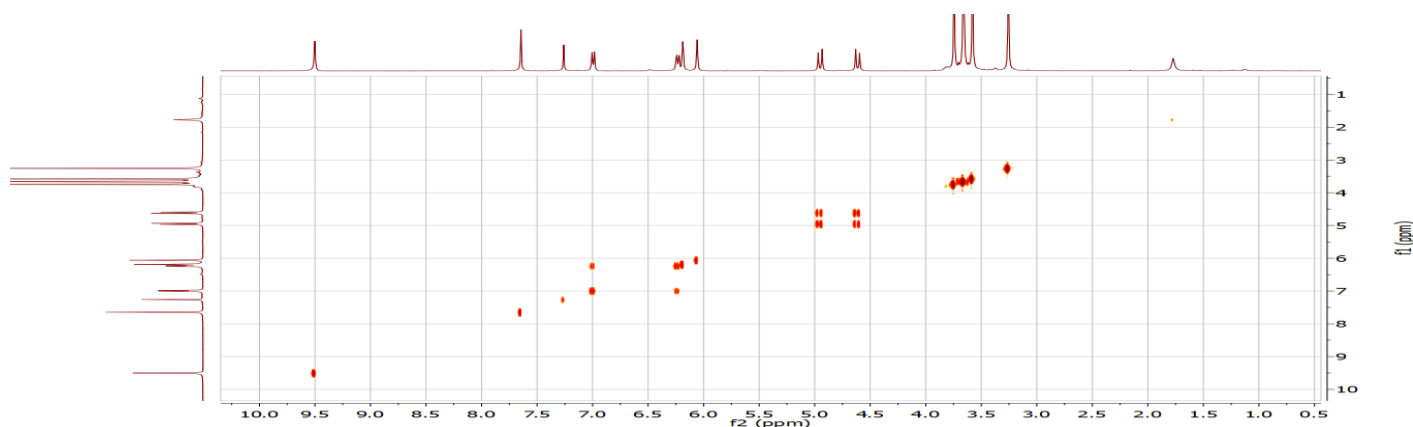

2D-COSY spectra of **6i**

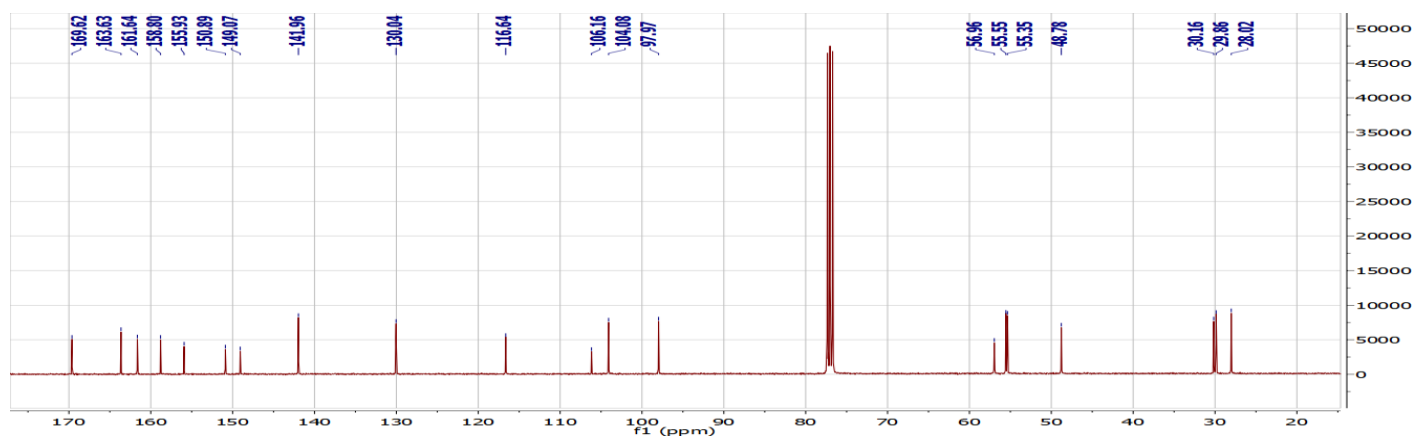

<sup>13</sup>C-RMN spectra of **6i**

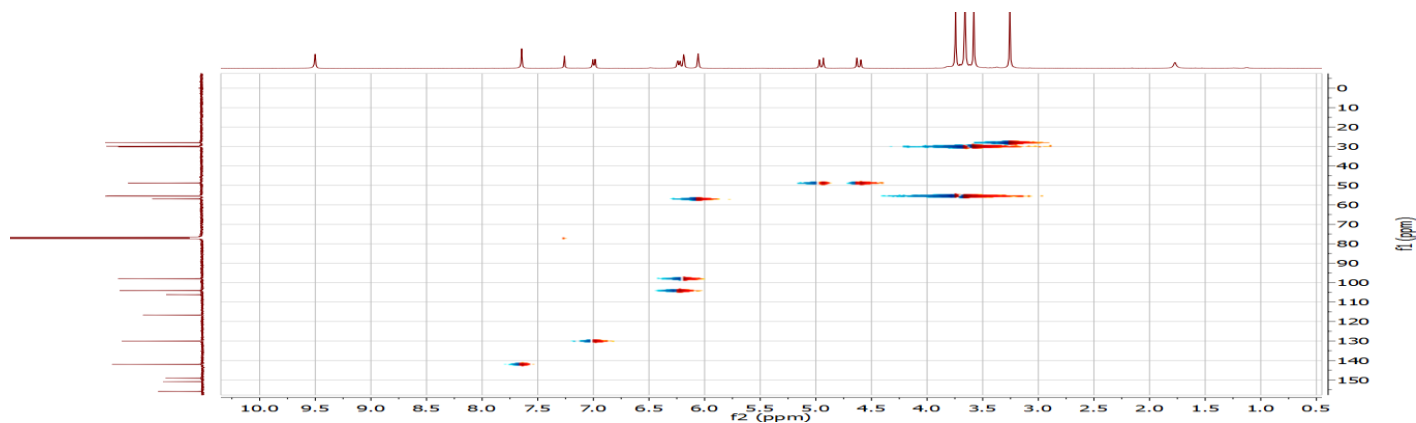

HSQC spectra of **6i**

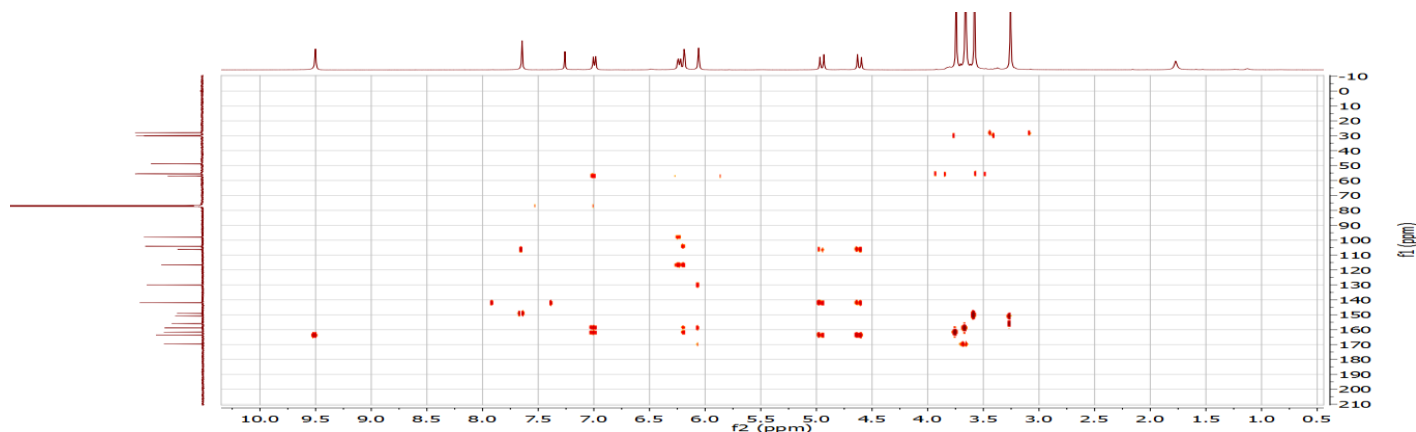

HMBC spectra of **6i**

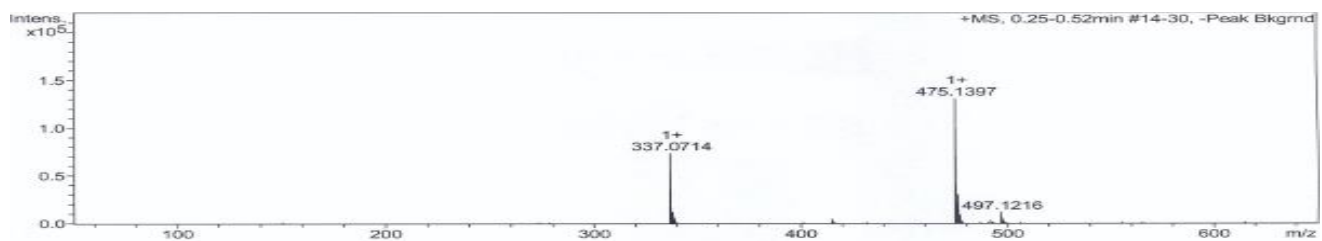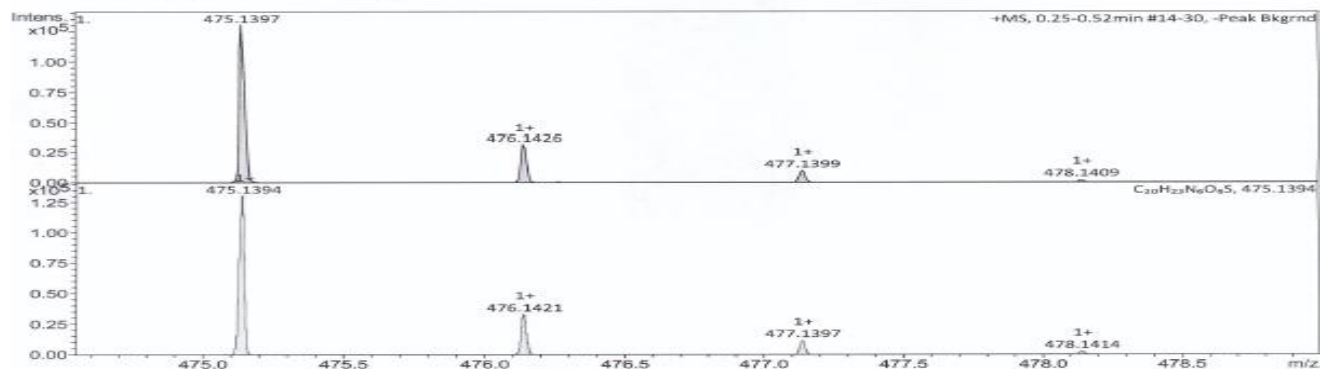

| Meas. m/z  | z  | # | Ion Formula                                                       | m/z        | err [ppm] | mSigma | rdB  | e <sup>-</sup> Conf |
|------------|----|---|-------------------------------------------------------------------|------------|-----------|--------|------|---------------------|
| 337.071445 | 1+ | 1 | C <sub>12</sub> H <sub>13</sub> N <sub>6</sub> O <sub>4</sub> S   | 337.071350 | -0.3      | 6.0    | 9.5  | even                |
| 475.139685 | 1+ | 1 | C <sub>20</sub> H <sub>23</sub> N <sub>6</sub> O <sub>6</sub> S   | 475.139430 | 0.5       | 12.0   | 12.5 | even                |
| 497.121569 | 1+ | 1 | C <sub>20</sub> H <sub>22</sub> N <sub>6</sub> NaO <sub>6</sub> S | 497.121374 | -0.4      | 7.5    | 12.5 | even                |

HRMS spectra of **6i**

2-(3,5-Dimethoxyphenyl)-3-[(1,3-dimethylxanthin-7-yl)acetamido]thiazolidine-4-one (6j)

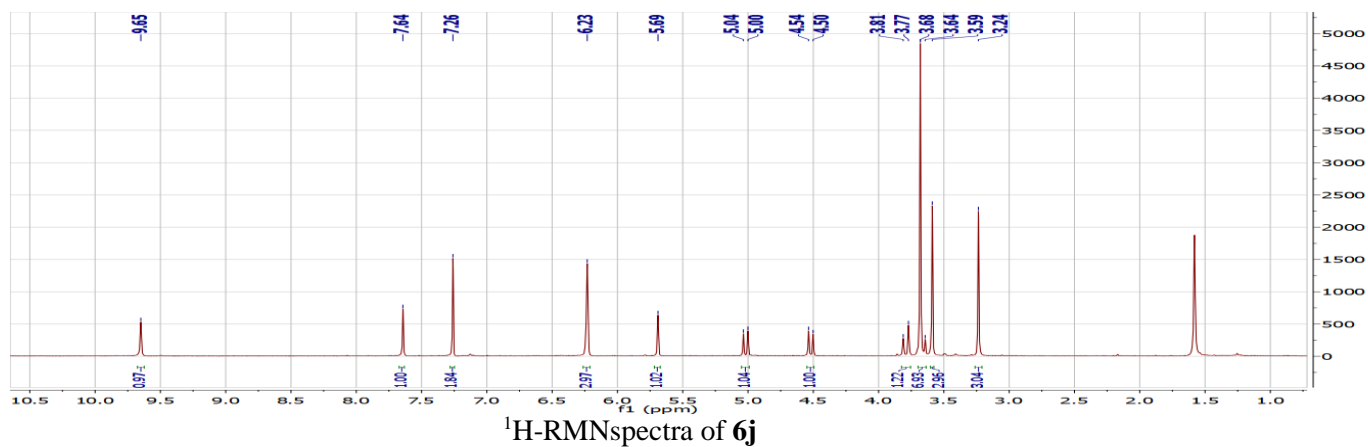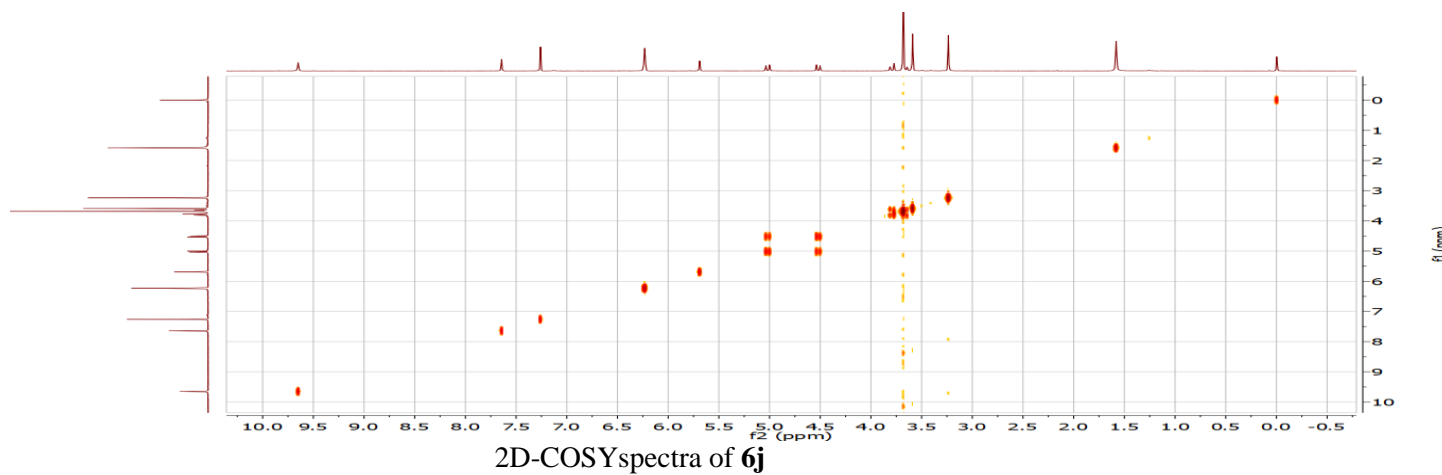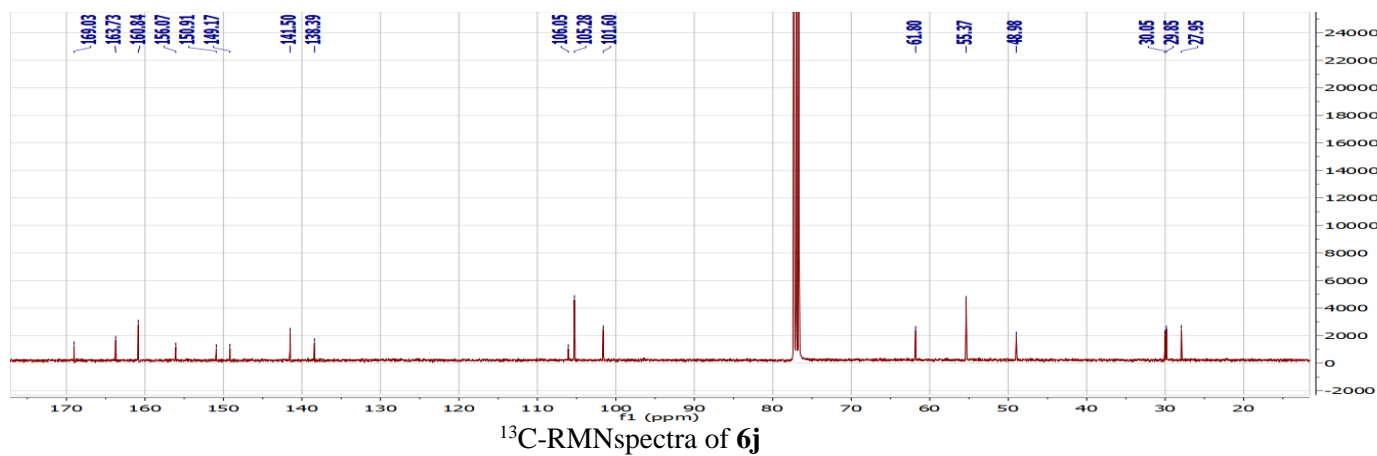

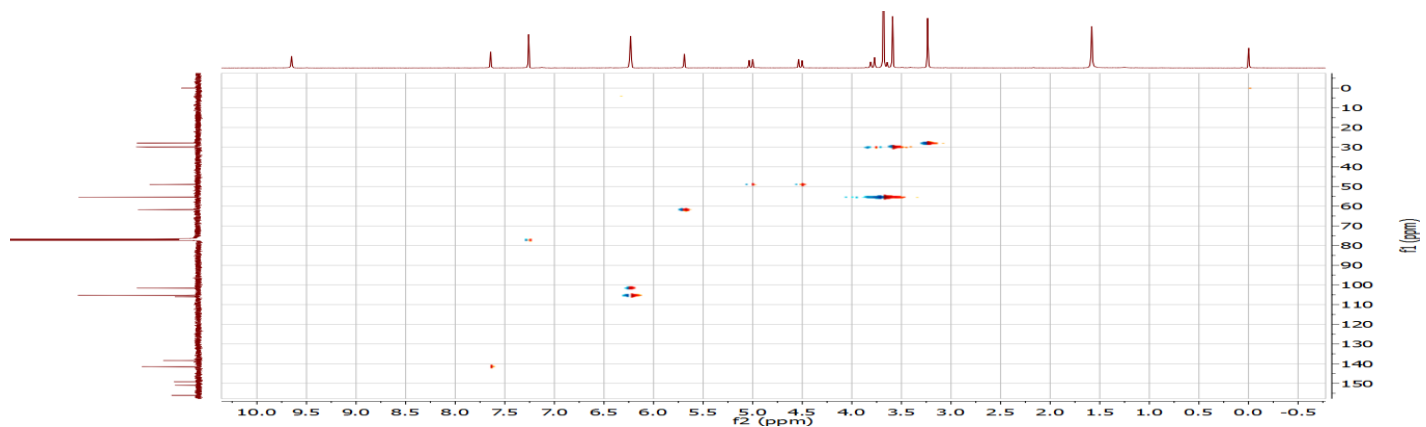

HSQC spectra of **6j**

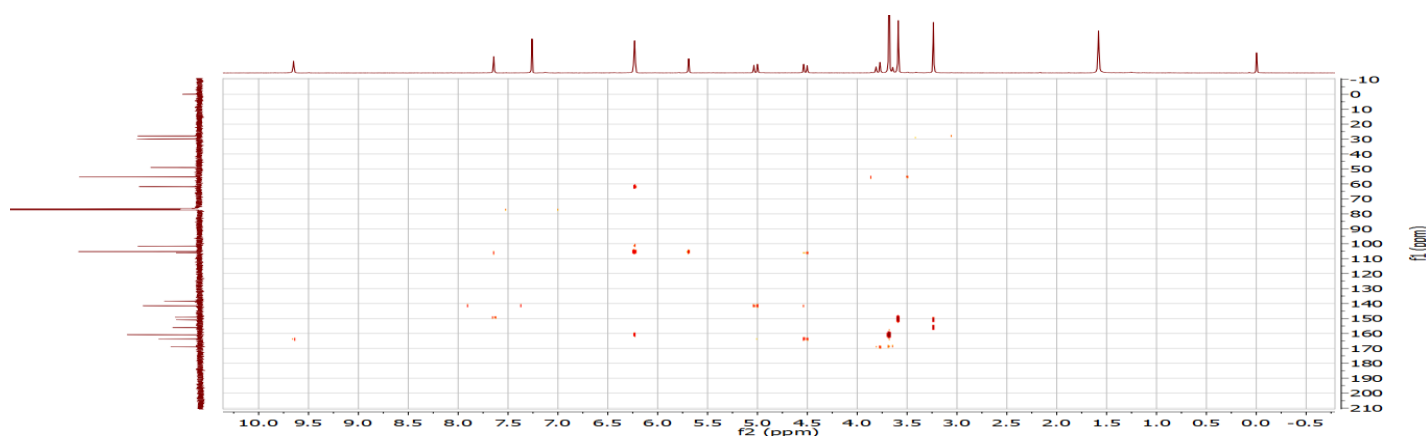

HMBC spectra of **6j**

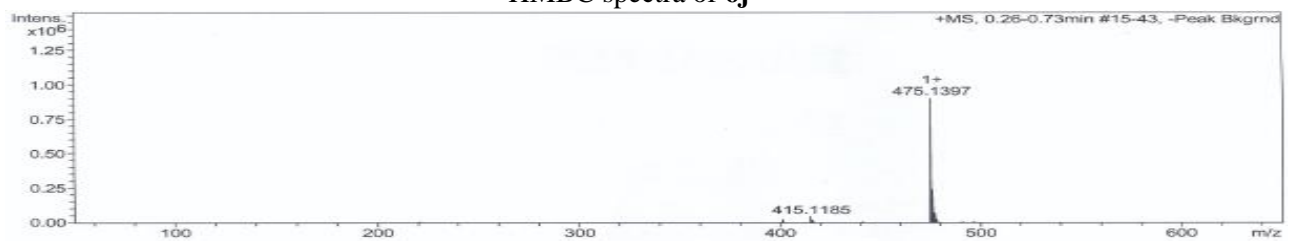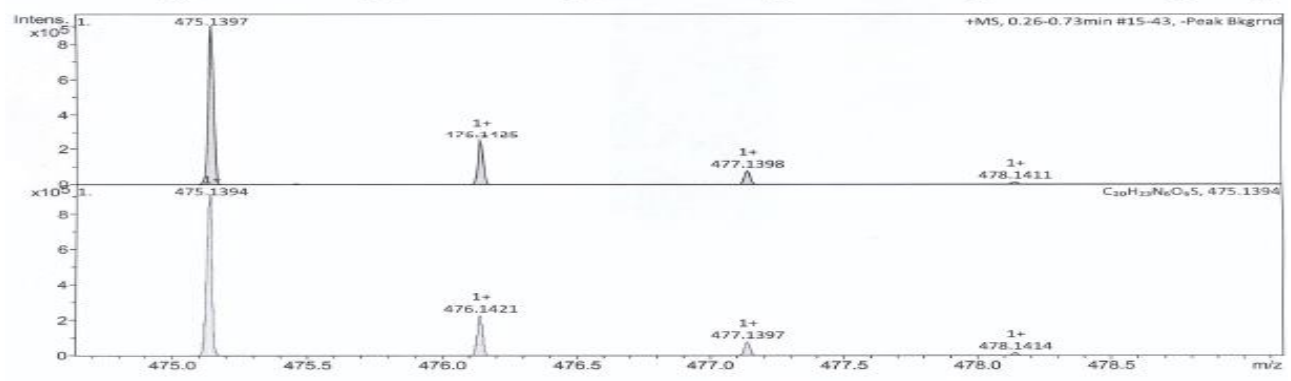

| Meas. m/z  | z  | # | Ion Formula | m/z        | err [ppm] | mSigma | rdb  | e <sup>-</sup> Conf |
|------------|----|---|-------------|------------|-----------|--------|------|---------------------|
| 415.118528 | 1+ | 1 | C18H19N6O4S | 415.118301 | -0.5      | 11.0   | 12.5 | even                |
| 475.139671 | 1+ | 1 | C20H23N6O4S | 475.139430 | -0.5      | 11.3   | 12.5 | even                |

HRMS spectra of **6j**

2-(4-Methylphenyl)-3-[(1,3-dimethylxanthin-7-yl)acethamido]thiazolidine-4-one (6k)

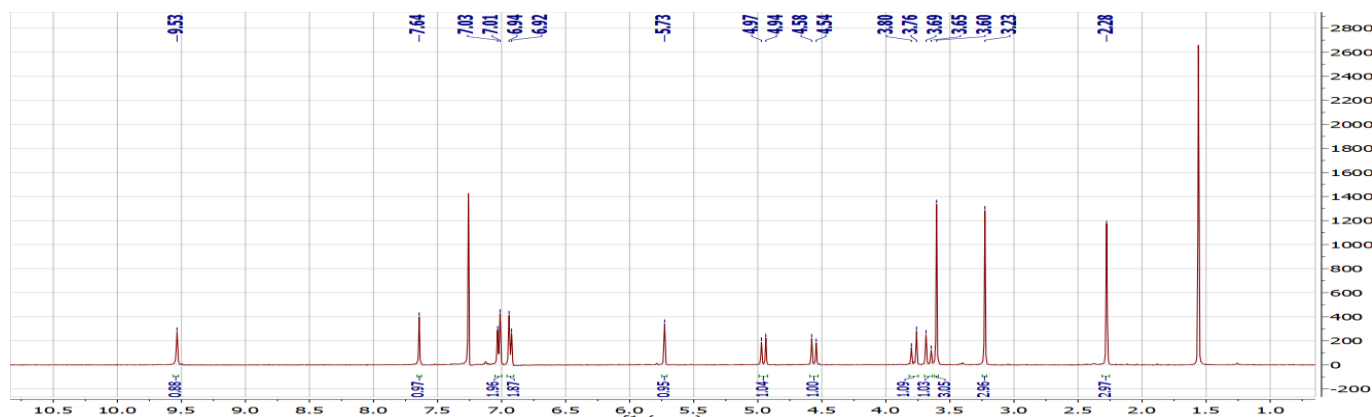

<sup>1</sup>H-RMN spectra of **6k**

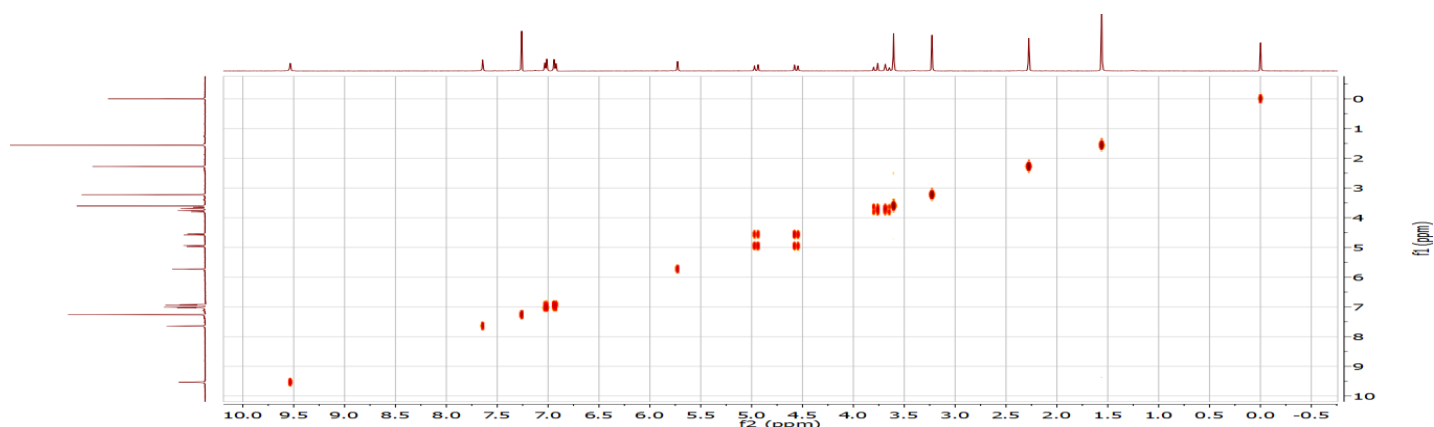

2D-COSY spectra of **6k**

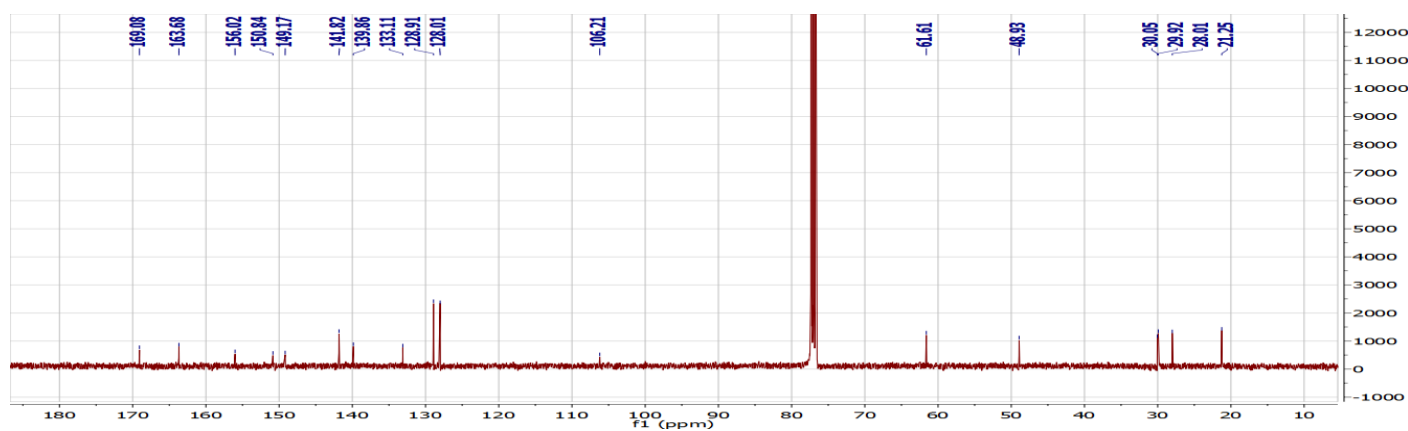

<sup>13</sup>C-RMN spectra of **6k**

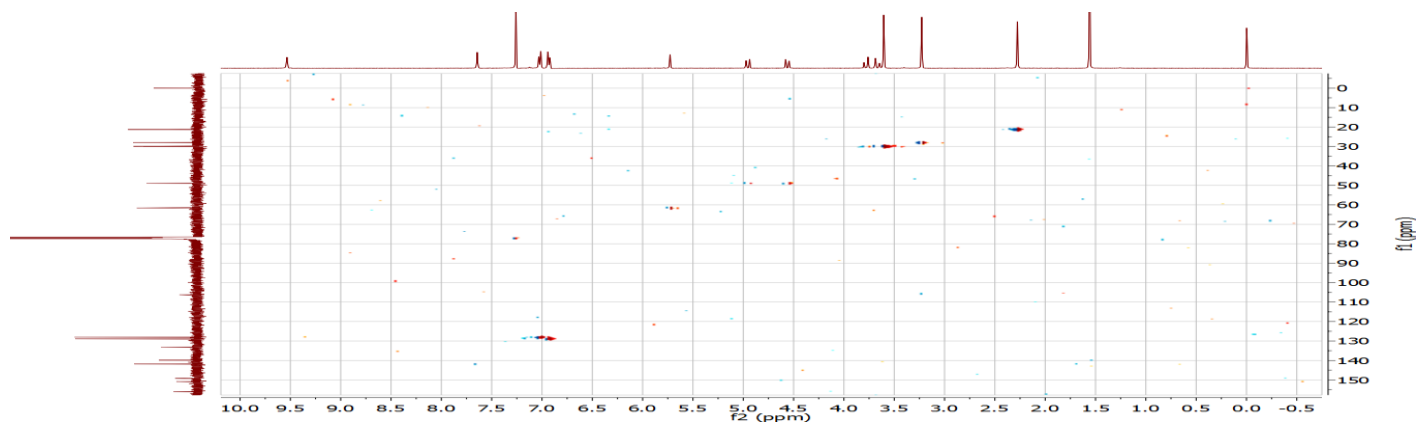

HSQC spectra of **6k**

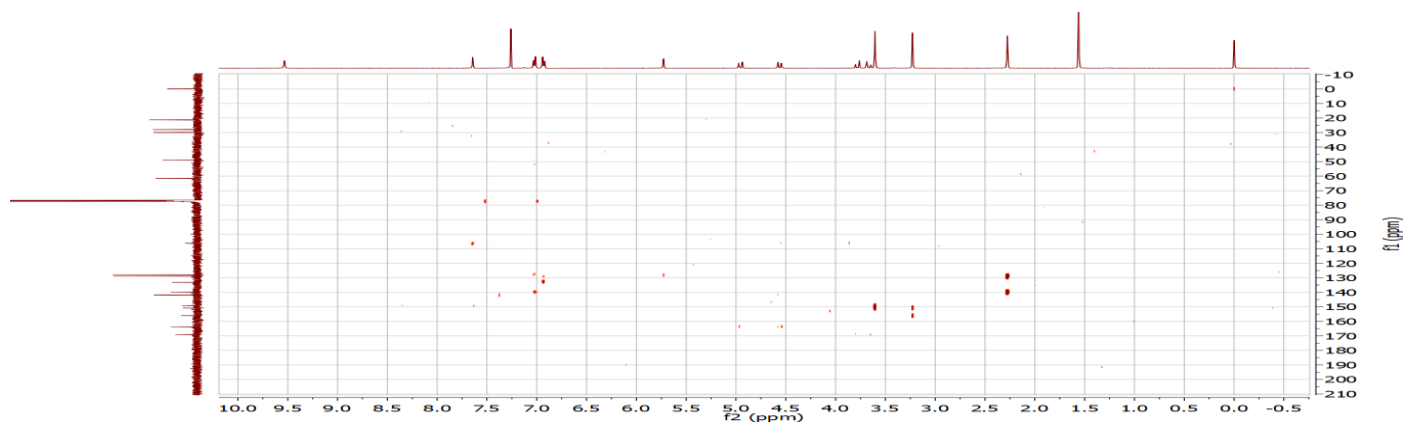

HMBC spectra of **6k**

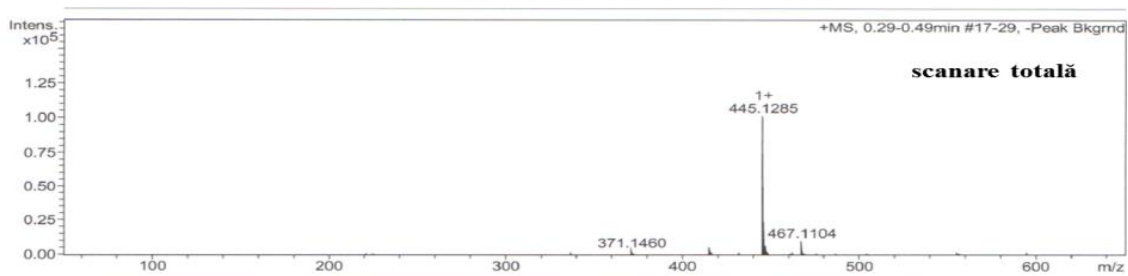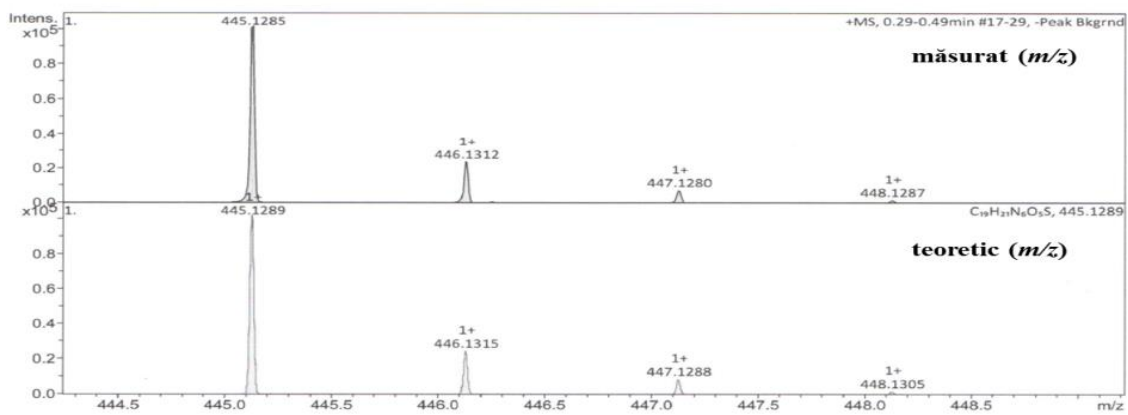

HRMS spectra of **6k**
